# Supplementary material for: From tetranuclear to pentanuclear [Co–Ln] (Ln = Gd, Tb, Dy, Ho) complexes across the lanthanide series: effect of varying sequence of ligand addition
Source: Royal Society of Chemistry journal article supplement (doi:10.1039/d1dt02038b), 2021-01-01
Supplement: d1dt02038b1.pdf [file d1dt02038b1.pdf]

## Electronic Supporting Information

### From Tetranuclear to Pentanuclear [Co–Ln] (Ln = Gd, Tb, Dy, Ho) Complexes Across the Lanthanide Series: Effect of Varying Sequence of Ligand Addition

Dipmalya Basak,<sup>a</sup> Lucy Smythe,<sup>b</sup> Radovan Herchel,<sup>c</sup> Mark Murrie,<sup>b</sup> Ivan Nemeč<sup>c,d</sup> and Debashis Ray<sup>\*a</sup>

<sup>a</sup>Department of Chemistry, Indian Institute of Technology, Kharagpur 721 302, India

<sup>b</sup>School of Chemistry, University of Glasgow, Glasgow, G12 8QQ, United Kingdom

<sup>c</sup>Department of Inorganic Chemistry, Faculty of Science, Palacky University, 17 Listopadu 12, Olomouc CZ-77146, Czech Republic

<sup>d</sup>Central European Institute of Technology, CEITEC BUT, Purkyňova 656/123, 61200 Brno, Czech Republic

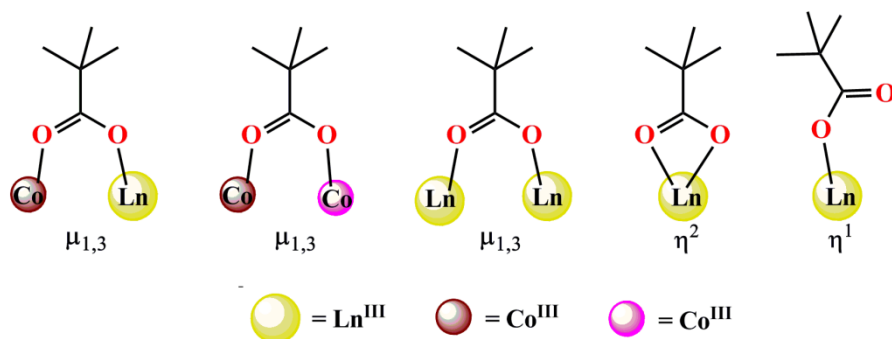

**Chart S1** Different binding modes of pivalate ions found in this work.

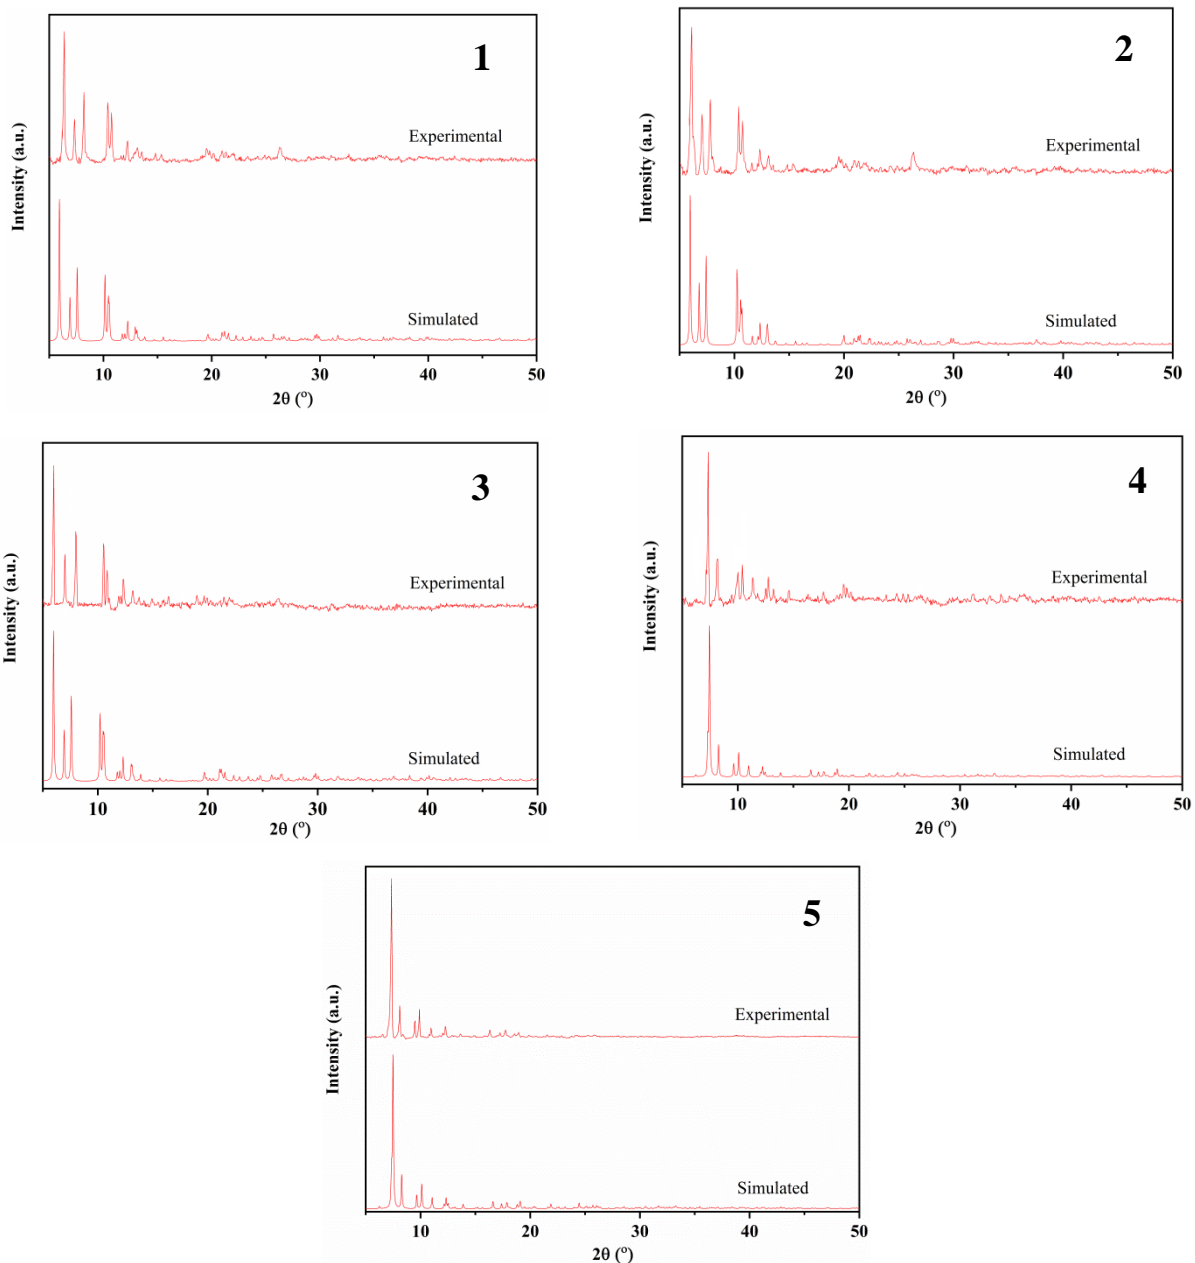

**Fig. S1** Experimental and simulated powder X-ray diffraction patterns for **1–5**.

### **Powder X-Ray Diffraction Patterns**

The powder XRD patterns of the bulk materials of **1–5**, collected using a Bruker AXS X-ray diffractometer, were compared with the simulations derived from the single crystal X-ray diffraction data. Figure S1 shows that the experimental powder patterns are in good agreement with the simulated ones. The difference in intensity is due to the orientation of the powder samples during experiment. The similarity infers that the prepared powder samples are pure and

have comparable composition to that of the single crystals. It is to be noted that the measurements were carried out immediately after collecting the bulk material from the crystallization mixture.

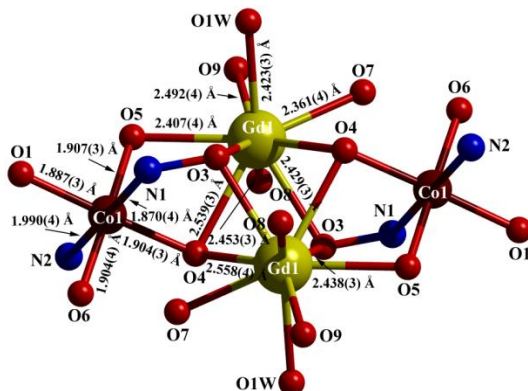

**Fig. S2** Core structure of **1** showing important bond distances. Color code: Co<sup>III</sup> brown, Gd<sup>III</sup> yellow, N blue, and O red.

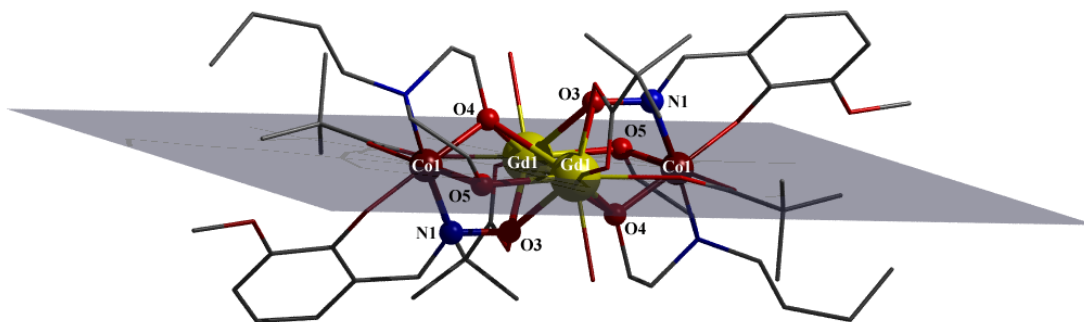

**Fig. S3** Positioning of metal ion centers and bridging O atoms with respect to the plane (grey blue) containing two Gd1 and two Co1 in **1**. Color code: Co<sup>III</sup> brown, Gd<sup>III</sup> yellow, N blue, O red, and C grey.

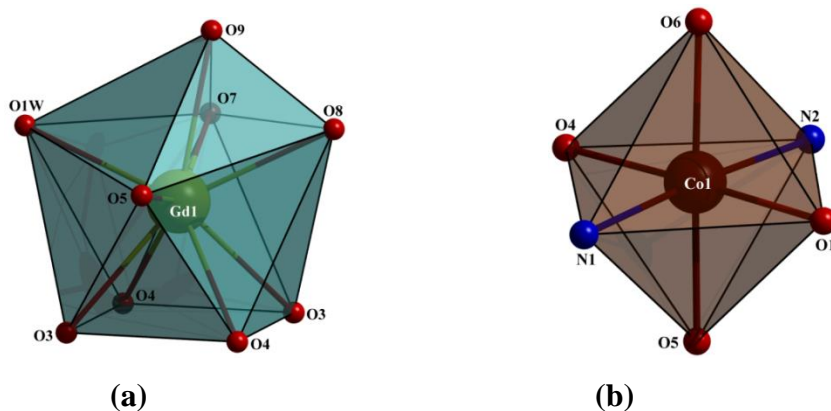

**Fig. S4** Geometries around Gd1 and Co1 in **1** as a representative example: (a) Distorted Muffin, (b) Distorted Octahedron. Both **2** and **3** exhibit similar geometries around Ln<sup>III</sup> and Co<sup>III</sup> centers.

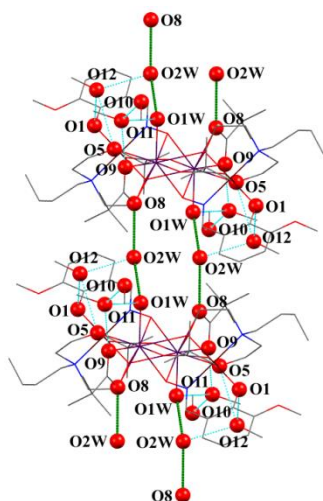

**Fig. S5** Hydrogen bonded infinite 1D chain structure formed with the help of lattice H<sub>2</sub>O molecules in **3**. The green lines represent the direction of growth of the chain while the trapping of MeOH molecules are shown by light blue lines.

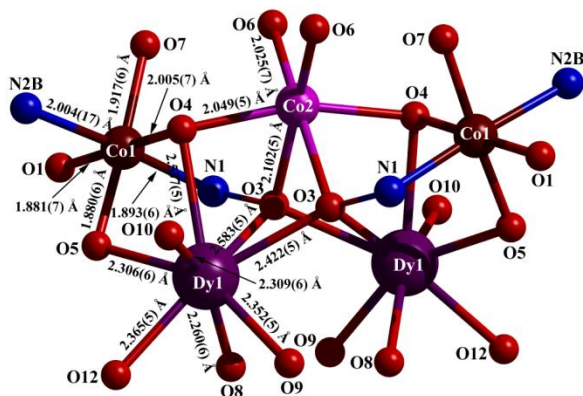

**Fig. S6** Core structure of **4** showing important bond distances. Color code: Co<sup>III</sup> brown, Co<sup>II</sup> pink, Dy<sup>III</sup> violet, N blue, and O red.

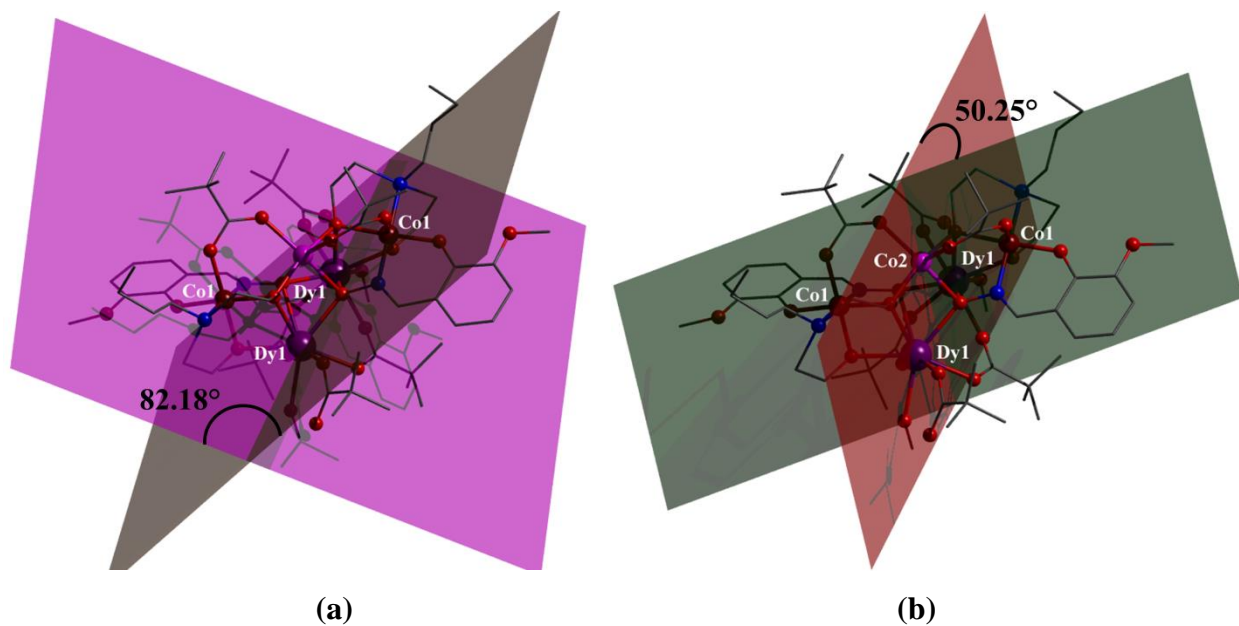

**Fig. S7** Spatial orientation of the planes containing (a) one Co<sup>I</sup> and two Dy<sup>I</sup>, (b) two Co<sup>I</sup>, one Co<sup>II</sup> and two Dy<sup>I</sup>, one Co<sup>II</sup> in **4**. Color code: Co<sup>III</sup> brown, Co<sup>II</sup> pink, Dy<sup>III</sup> violet, N blue, O red, and C grey.

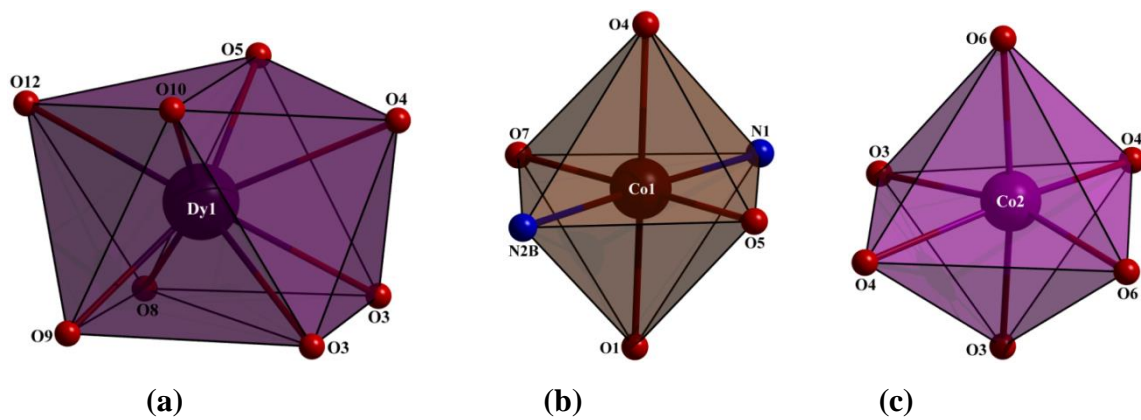

**Fig. S8** Geometries around Dy<sup>I</sup>, Co<sup>I</sup> and Co<sup>II</sup> in **4** as a representative example: (a) Distorted Square Antiprism, (b) and (c) Distorted Octahedron. **5** exhibits similar geometries around Ho<sup>III</sup>, Co<sup>II</sup> and Co<sup>III</sup> centers.

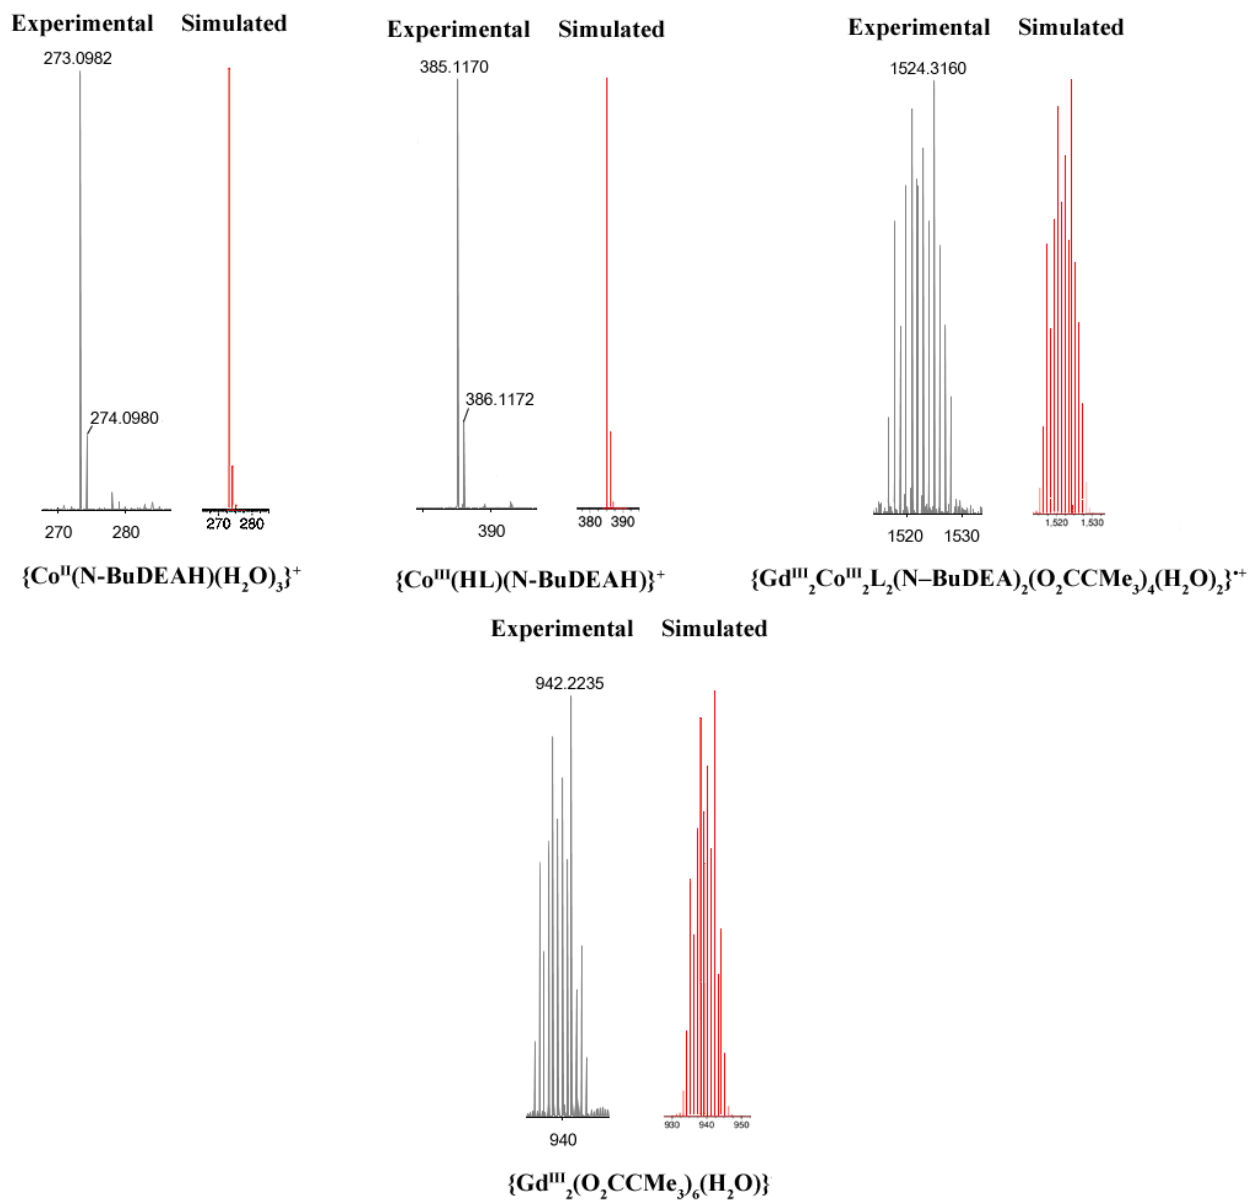

**Fig. S9** Experimental and simulated peaks corresponding to different species present in solution obtained from HRMS (+ve) for addition of N-BuDEAH<sub>2</sub> before H<sub>2</sub>L during synthesis of **1** in MeOH.

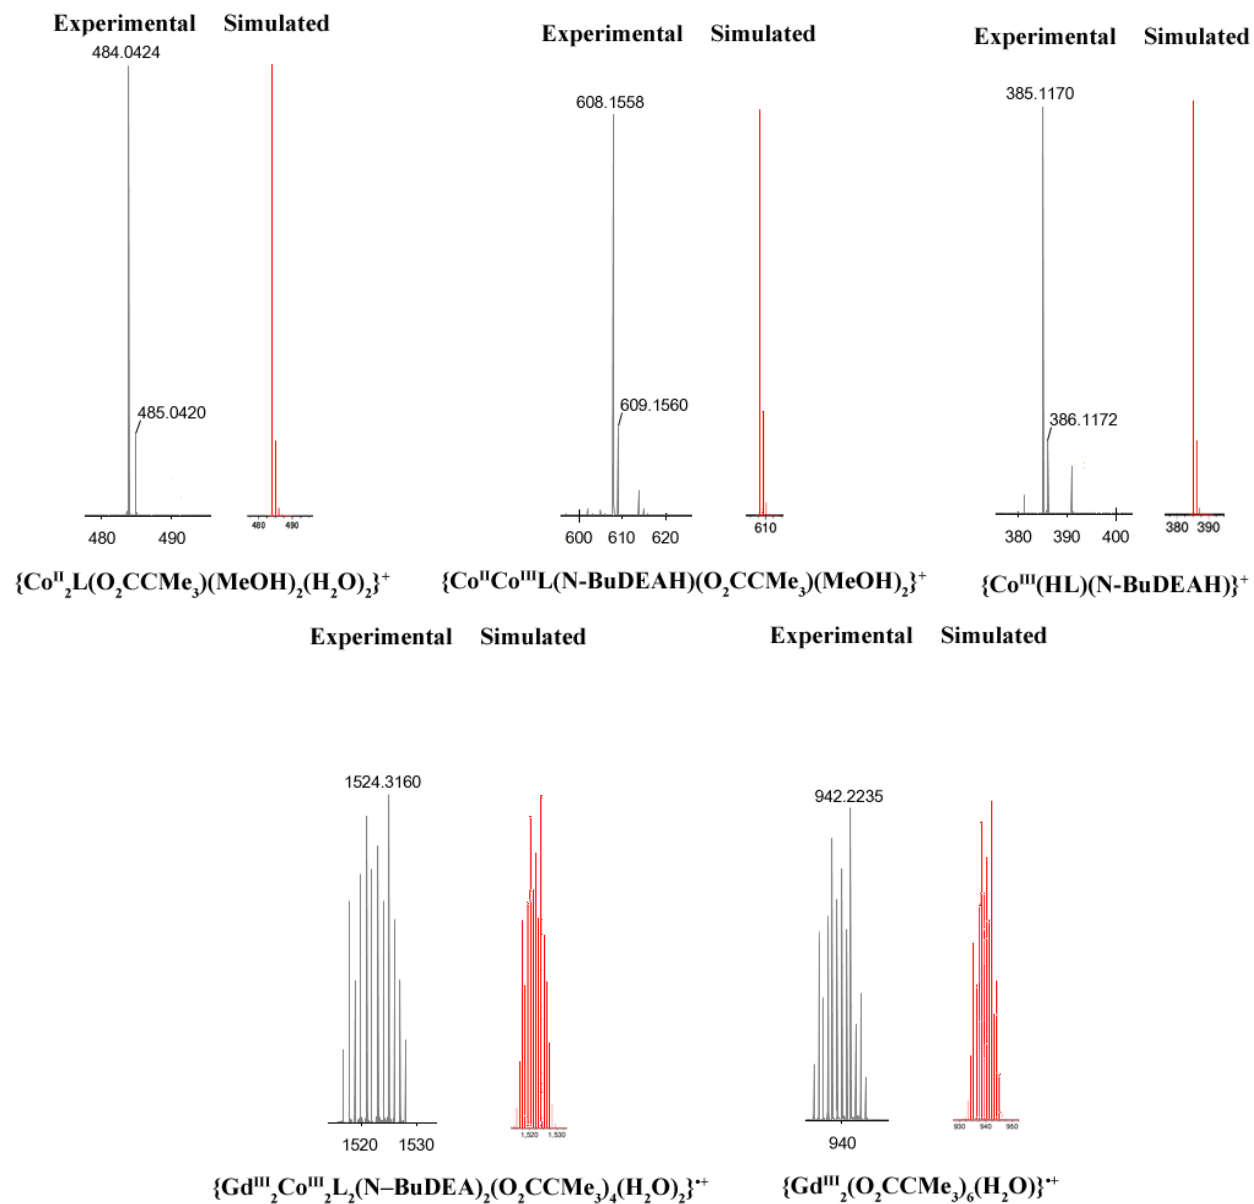

**Fig. S10** Experimental and simulated peaks corresponding to different species present in solution obtained from HRMS (+ve) for addition of  $\text{H}_2\text{L}$  before  $\text{N-BuDEAH}_2$  during synthesis of **1** in MeOH.

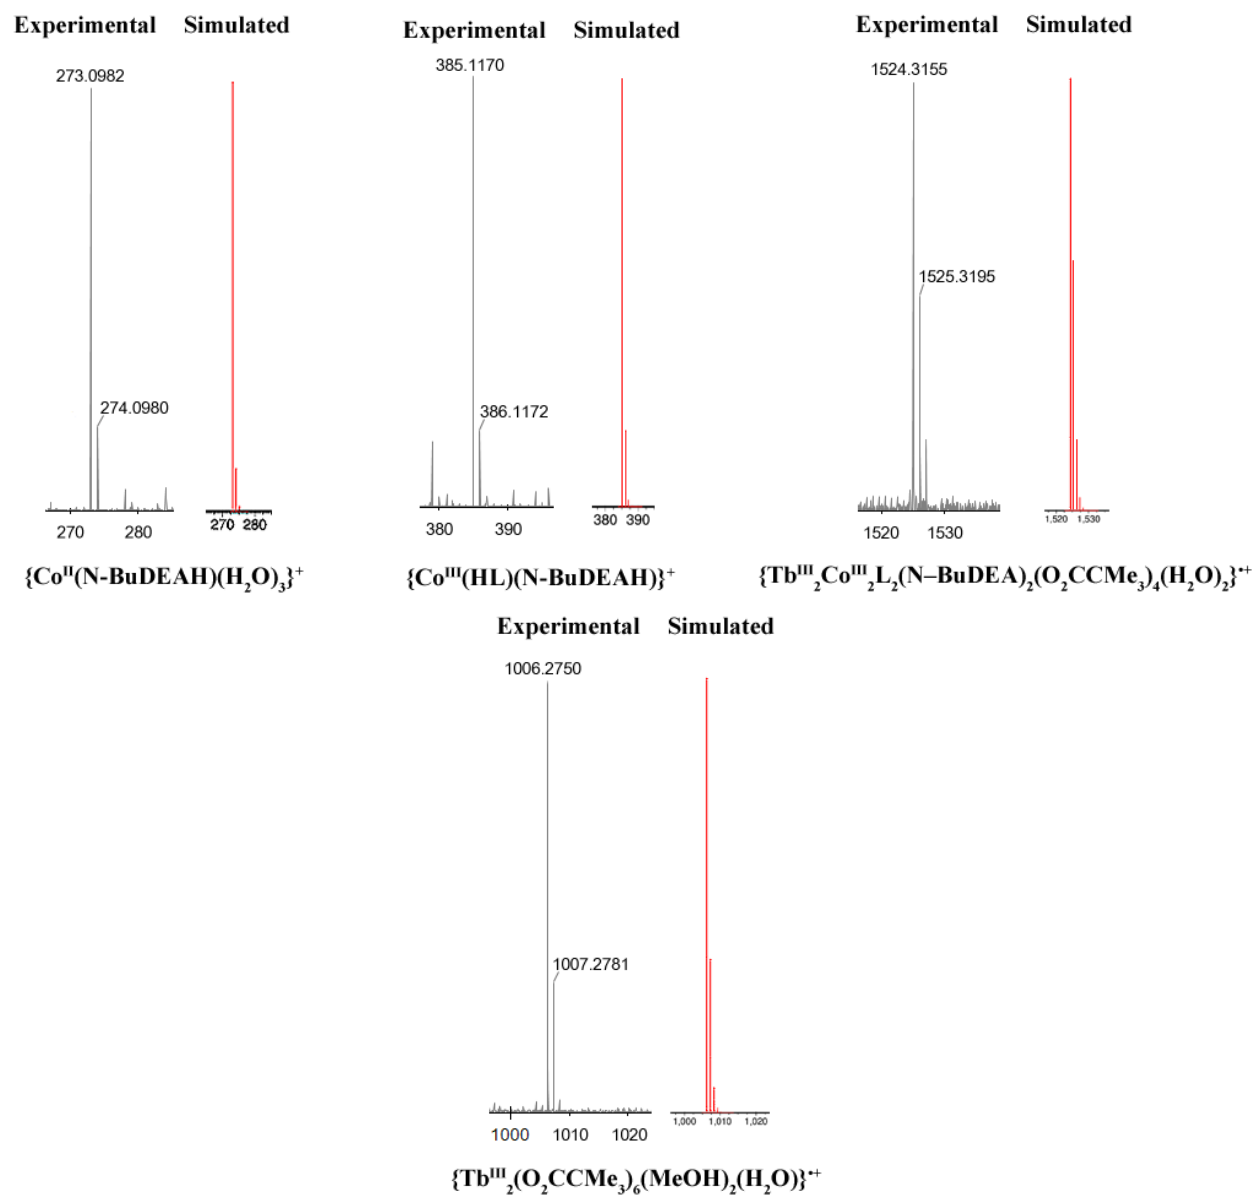

**Fig. S11** Experimental and simulated peaks corresponding to different species present in solution obtained from HRMS (+ve) for addition of N-BuDEAH<sub>2</sub> before H<sub>2</sub>L during synthesis of **2** in MeOH.



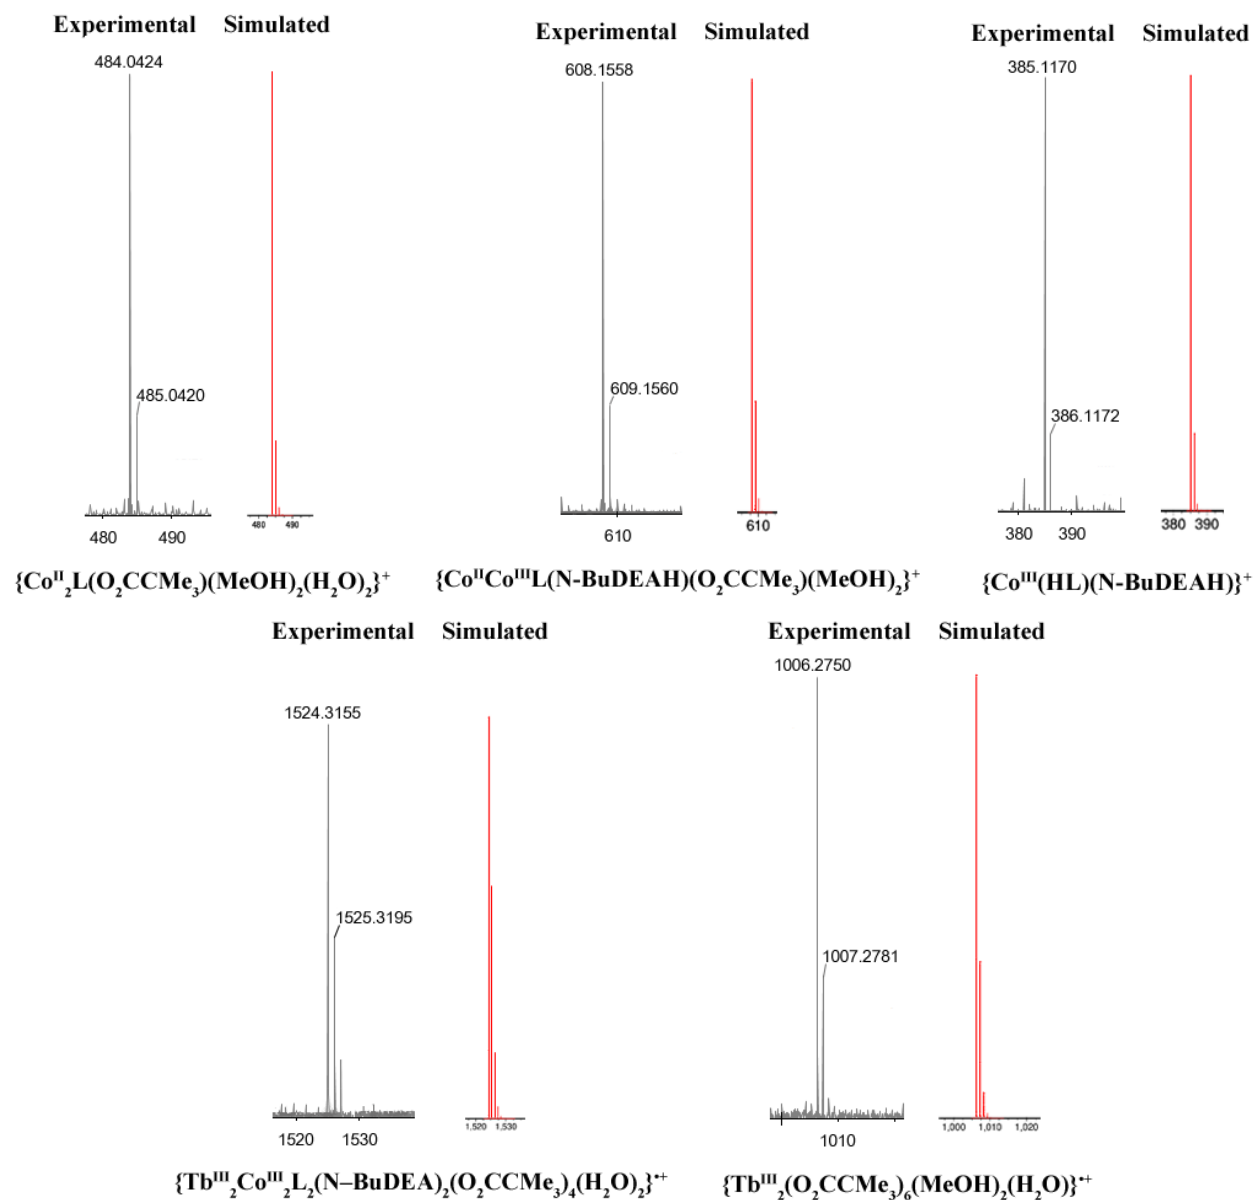

**Fig. S12** Experimental and simulated peaks corresponding to different species present in solution obtained from HRMS (+ve) for addition of  $\text{H}_2\text{L}$  before  $\text{N-BuDEAH}_2$  during synthesis of **2** in MeOH.

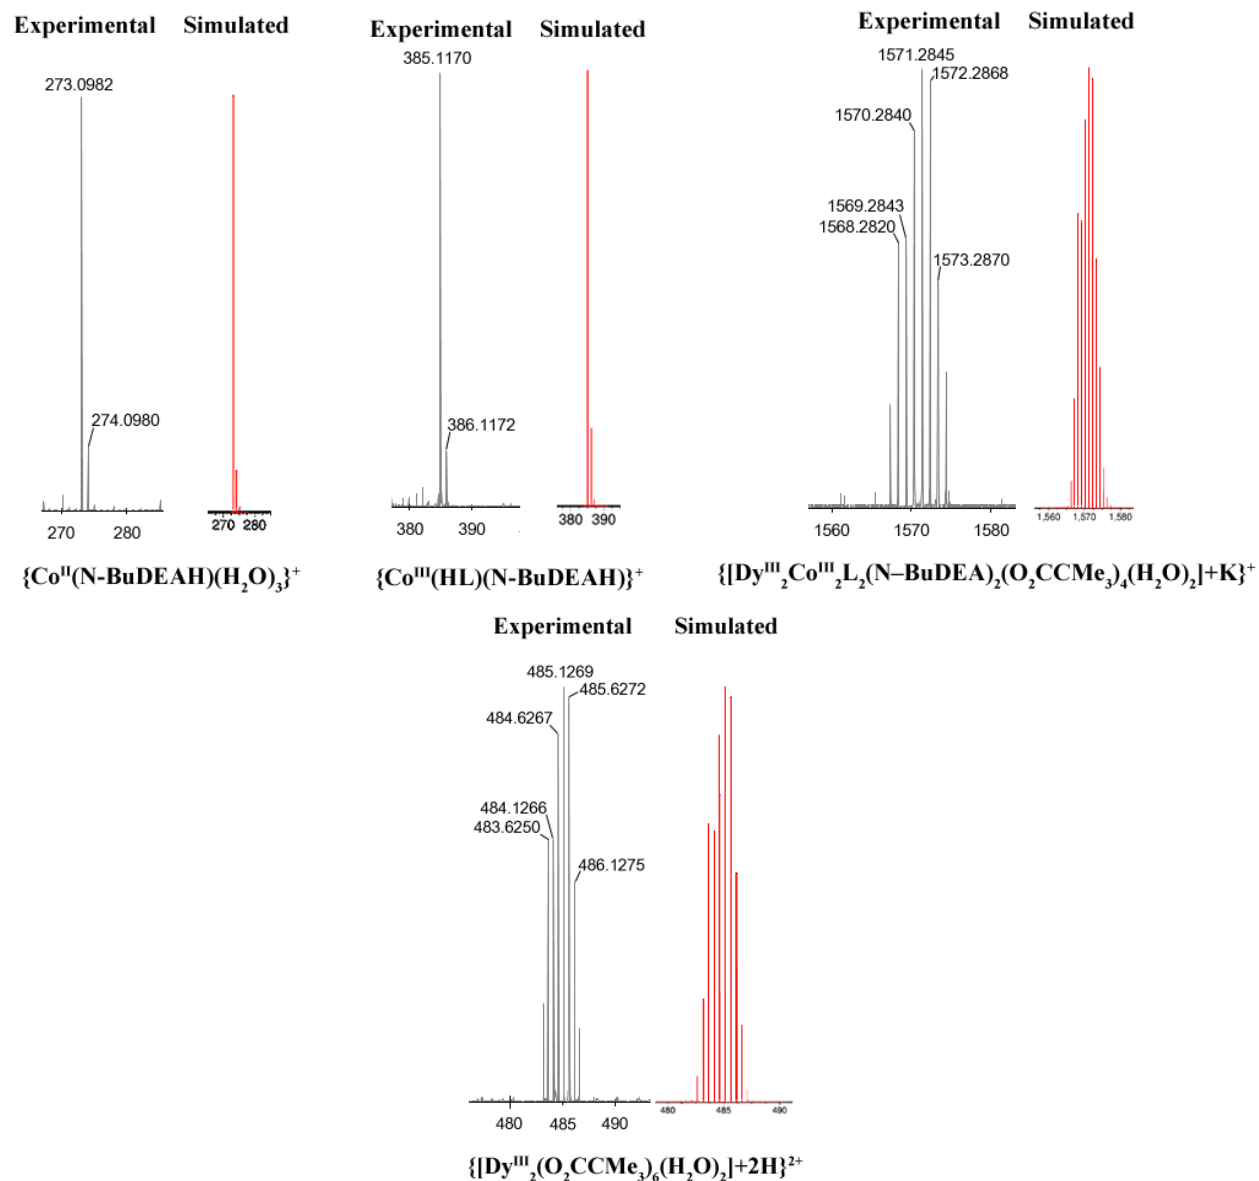

**Fig. S13** Experimental and simulated peaks corresponding to different species present in solution obtained from HRMS (+ve) during synthesis of **3** in MeOH.

**Experimental Simulated**

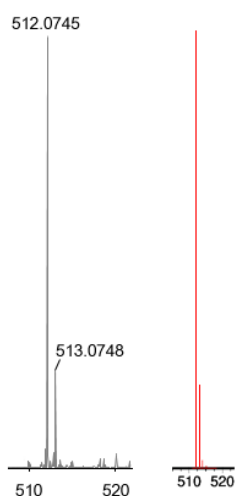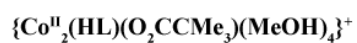

**Experimental Simulated**

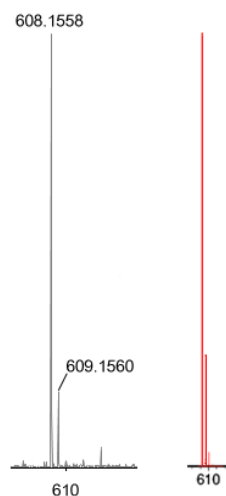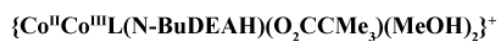

**Experimental Simulated**

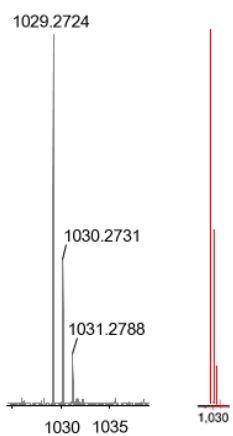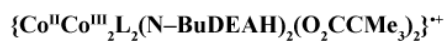

**Experimental Simulated**

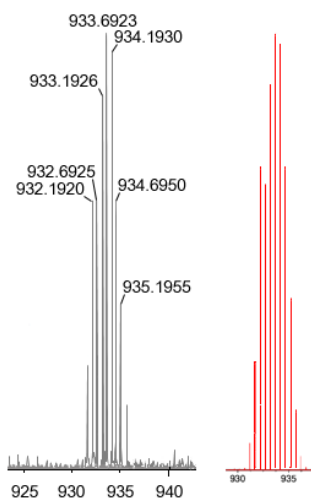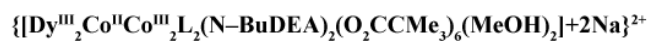

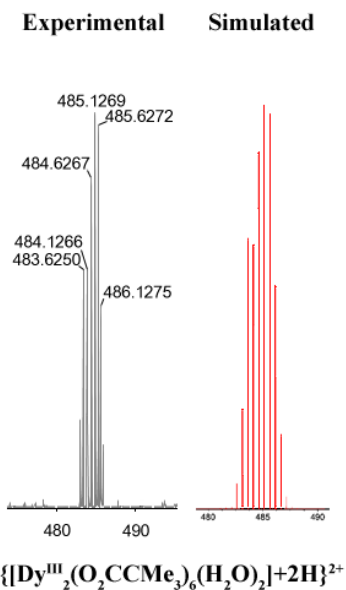

**Fig. S14** Experimental and simulated peaks corresponding to different species present in solution obtained from HRMS (+ve) during synthesis of **4** in MeOH.

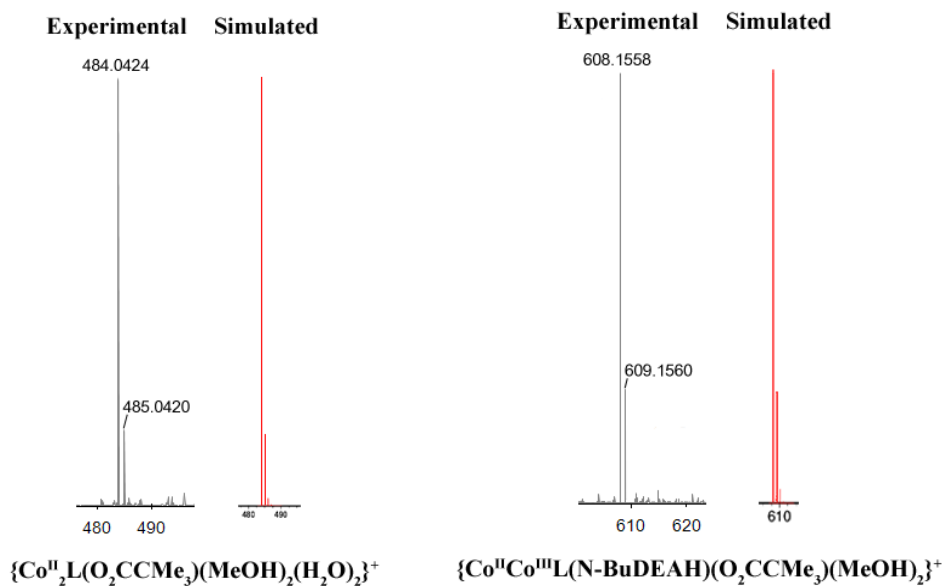

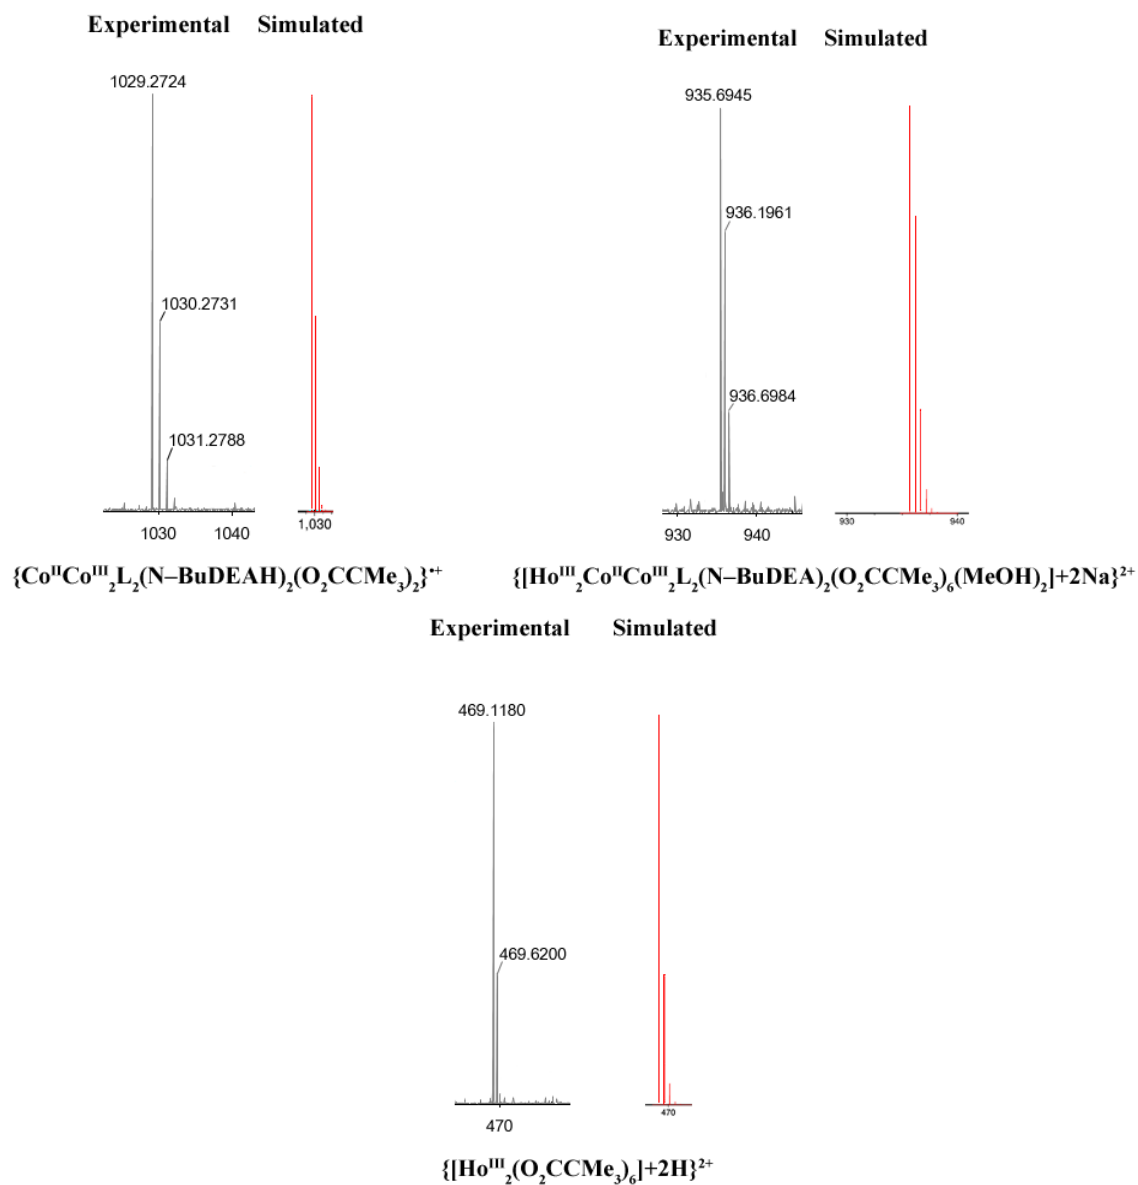

**Fig. S15** Experimental and simulated peaks corresponding to different species present in solution obtained from HRMS (+ve) for addition of  $\text{H}_2\text{L}$  before  $\text{N-BuDEAH}_2$  during synthesis of **5** in MeOH.

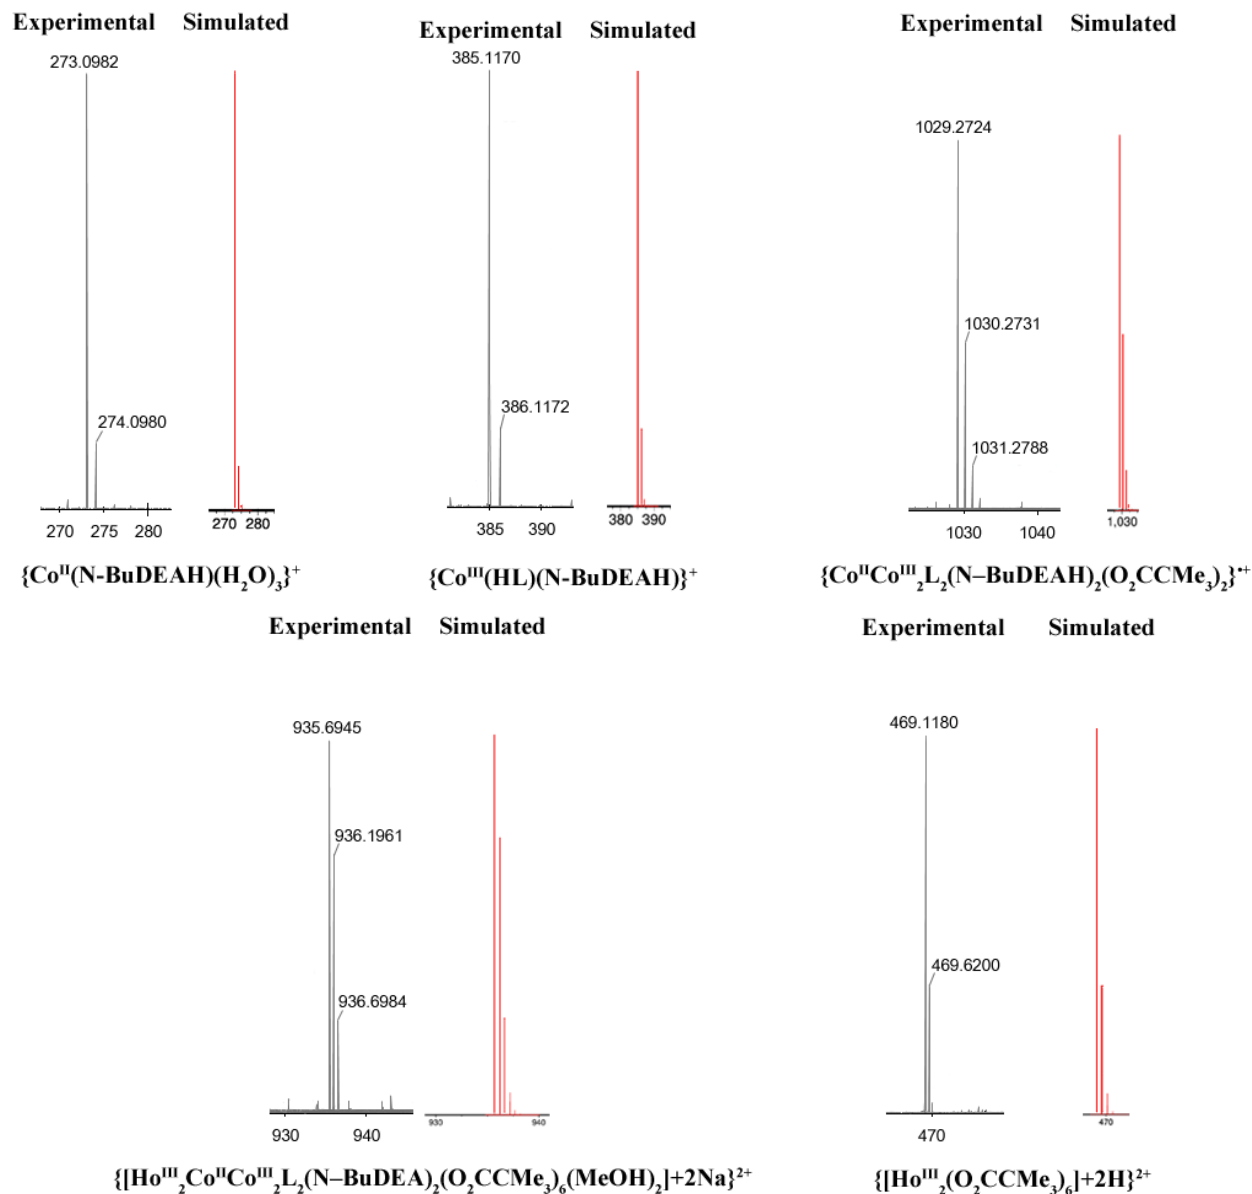

**Fig. S16** Experimental and simulated peaks corresponding to different species present in solution obtained from HRMS (+ve) for addition of N-BuDEAH<sub>2</sub> before H<sub>2</sub>L during synthesis of **5** in MeOH.

### Aggregation pathways for **1**, **2** and **5**

In case of **1** and **2** when N-BuDEAH<sub>2</sub> was added before H<sub>2</sub>L (Scheme S1; Path I), both the complexes showed peaks at  $m/z = 273.0982$  and  $385.1170$  (Fig. S9 and S11) corresponding to  $\{\text{Co}^{\text{II}}(\text{N-BuDEAH})(\text{H}_2\text{O})_3\}^+$  and  $\{\text{Co}^{\text{III}}(\text{HL})(\text{N-BuDEA})\}^+$  (Scheme S1; species **a** and **b**) similar to **3**. Presence of dinuclear gadolinium and terbium pivalate, respectively, could also be ascertained from the peaks at  $m/z = 942.2235$  (**1**, Fig. S9) and  $1006.2750$  (**2**, Fig. S11) corresponding to  $\{\text{Gd}^{\text{III}}_2(\text{O}_2\text{CCMe}_3)_6(\text{H}_2\text{O})\}^{++}$  ( $\text{C}_{40}\text{H}_{56}\text{Gd}_2\text{O}_{13}$ ; calcd.  $942.2232$ ) and

$\{\text{Tb}^{\text{III}}_2(\text{O}_2\text{CCMe}_3)_6(\text{MeOH})_2(\text{H}_2\text{O})\}^{++}$  ( $\text{C}_{40}\text{H}_{56}\text{Gd}_2\text{O}_{13}$ ; calcd. 942.2232). Peaks at  $m/z = 1524.3160$  (Fig. S9) and  $1524.3155$  (Fig. S11) assignable to  $\{[\text{Gd}^{\text{III}}_2\text{Co}^{\text{III}}_2\text{L}_2(\text{N-BuDEA})_2(\text{O}_2\text{CCMe}_3)_4(\text{H}_2\text{O})_2]\}^{++}$  ( $\text{C}_{52}\text{H}_{88}\text{Co}_2\text{Gd}_2\text{N}_4\text{O}_{20}$ ; calcd. 1524.3167) and  $\{[\text{Tb}^{\text{III}}_2\text{Co}^{\text{III}}_2\text{L}_2(\text{N-BuDEA})_2(\text{O}_2\text{CCMe}_3)_4(\text{H}_2\text{O})_2]\}^{++}$  ( $\text{C}_{52}\text{H}_{88}\text{Co}_2\text{Tb}_2\text{N}_4\text{O}_{20}$ ; calcd. 1524.3163) respectively confirmed the existence of **1** and **2** in solution.

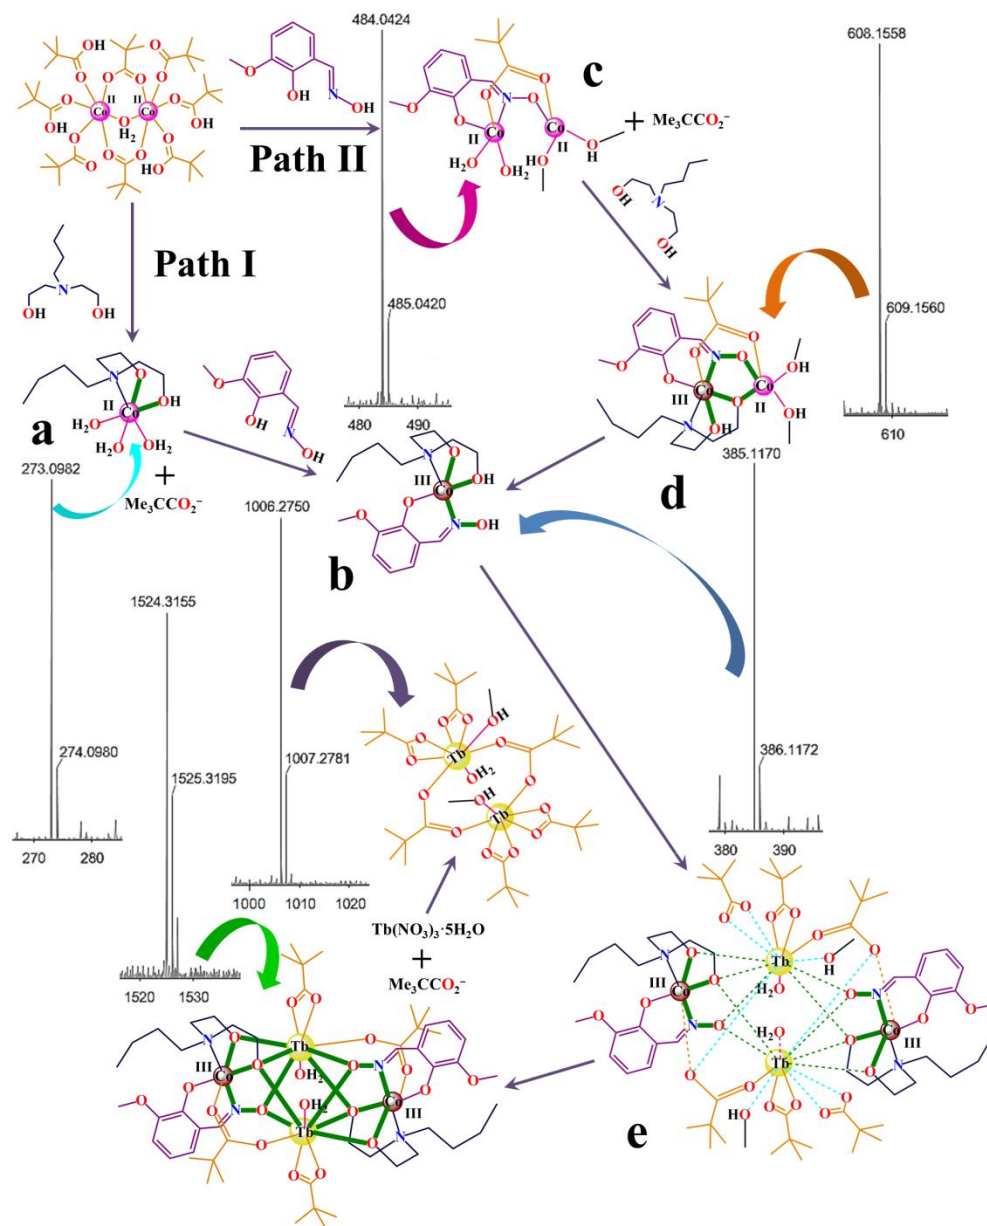

**Scheme S1** Proposed pathway for the formation of **2** in MeOH medium for different order of addition of  $\text{H}_2\text{L}$  and  $\text{N-BuDEAH}_2$ . **1** exhibits a very similar pathway for aggregation reaction.

When H<sub>2</sub>L is added before N–BuDEAH<sub>2</sub> (Scheme S1, Path II), the complexes show peaks at  $m/z = 484.0424$  and  $608.1558$  (Fig. S10 and S12) corresponding to dinuclear species  $\{\text{Co}^{\text{II}}_2(\text{HL})(\text{O}_2\text{CCMe}_3)(\text{MeOH})_2(\text{H}_2\text{O})_2\}^+$  (C<sub>15</sub>H<sub>28</sub>Co<sub>2</sub>NO<sub>9</sub>; calcd. 484.0428) and  $\{\text{Co}^{\text{II}}\text{Co}^{\text{III}}\text{L}(\text{N–BuDEAH})(\text{O}_2\text{CCMe}_3)(\text{MeOH})_2\}^+$  (Scheme S1; species **c** and **d**) similar to **4**. Unlike **4**, the mass spectra also shows a peak at  $m/z = 385.1170$  for the species  $\{\text{Co}^{\text{III}}(\text{HL})(\text{N–BuDEA})\}^+$  (Scheme S1; species **b**) as observed when N–BuDEAH<sub>2</sub> is added first. The presence of lanthanide pivalates and complexes **1** and **2** in solution could be ascertained from peaks similar to those described earlier.

In case of **5**, for addition of H<sub>2</sub>L first (Scheme S2, Path I), the presence of dinuclear species  $\{\text{Co}^{\text{II}}_2(\text{HL})(\text{O}_2\text{CCMe}_3)(\text{MeOH})_2(\text{H}_2\text{O})_2\}^+$  and  $\{\text{Co}^{\text{II}}\text{Co}^{\text{III}}\text{L}(\text{N–BuDEAH})(\text{O}_2\text{CCMe}_3)(\text{MeOH})_2\}^+$  (Scheme S2; species **c** and **d**) are ascertained from peaks at  $m/z = 484.0424$  and  $608.1558$  (Fig. S15) while the peak at  $m/z = 1029.2724$  is due to the trinuclear species  $\{\text{Co}^{\text{II}}\text{Co}^{\text{III}}_2\text{L}_2(\text{N–BuDEAH})_2(\text{O}_2\text{CCMe}_3)_2\}^{2+}$  (Scheme S2; species **e**). Dinuclear holmium pivalate could be identified from the peak at  $m/z = 469.1180$  corresponding to  $\{[\text{Ho}^{\text{III}}_2(\text{O}_2\text{CCMe}_3)_6]+2\text{H}\}^{2+}$  (C<sub>30</sub>H<sub>56</sub>Ho<sub>2</sub>O<sub>12</sub>; calcd. 469.1184) which is trapped by species **e** forming complex **5** via intermediate **f** (Scheme S2). The species  $\{[\text{Ho}^{\text{III}}_2\text{Co}^{\text{II}}\text{Co}^{\text{III}}_2\text{L}_2(\text{N–BuDEA})_2(\text{O}_2\text{CCMe}_3)_6(\text{MeOH})_2]+2\text{Na}\}^{2+}$  (C<sub>64</sub>H<sub>110</sub>Co<sub>3</sub>Ho<sub>2</sub>N<sub>4</sub>Na<sub>2</sub>O<sub>24</sub>; calcd. 935.6949) identified from the peak at  $m/z = 935.6945$  points to the presence of **5** in solution. When N–BuDEAH<sub>2</sub> is added before H<sub>2</sub>L (Scheme S2; Path II), mononuclear species  $\{\text{Co}^{\text{II}}(\text{N–BuDEAH})(\text{H}_2\text{O})_3\}^+$  and  $\{\text{Co}^{\text{III}}(\text{HL})(\text{N–BuDEA})\}^+$  (Scheme S2; species **a** and **b**) could be identified at  $m/z = 273.0982$  and  $385.1170$  (Fig. S16) similar to **3**. But unlike **3**, the trinuclear species  $\{\text{Co}^{\text{II}}\text{Co}^{\text{III}}_2\text{L}_2(\text{N–BuDEAH})_2(\text{O}_2\text{CCMe}_3)_2\}^{2+}$  (Scheme S2; species **e**) was identified from the peak at  $m/z = 1029.2724$ , formed by the trapping of a Co<sup>II</sup> ion along with two Me<sub>3</sub>CCO<sub>2</sub><sup>–</sup> anions by two species **b**. This process is perhaps less favourable resulting in lower yields of **5** by Path II. The presence of dinuclear holmium pivalate and complex **5** in solution were ascertained as described earlier. Formation of **5** from species **e** through intermediate **f** is similar to that described previously (Scheme S2).



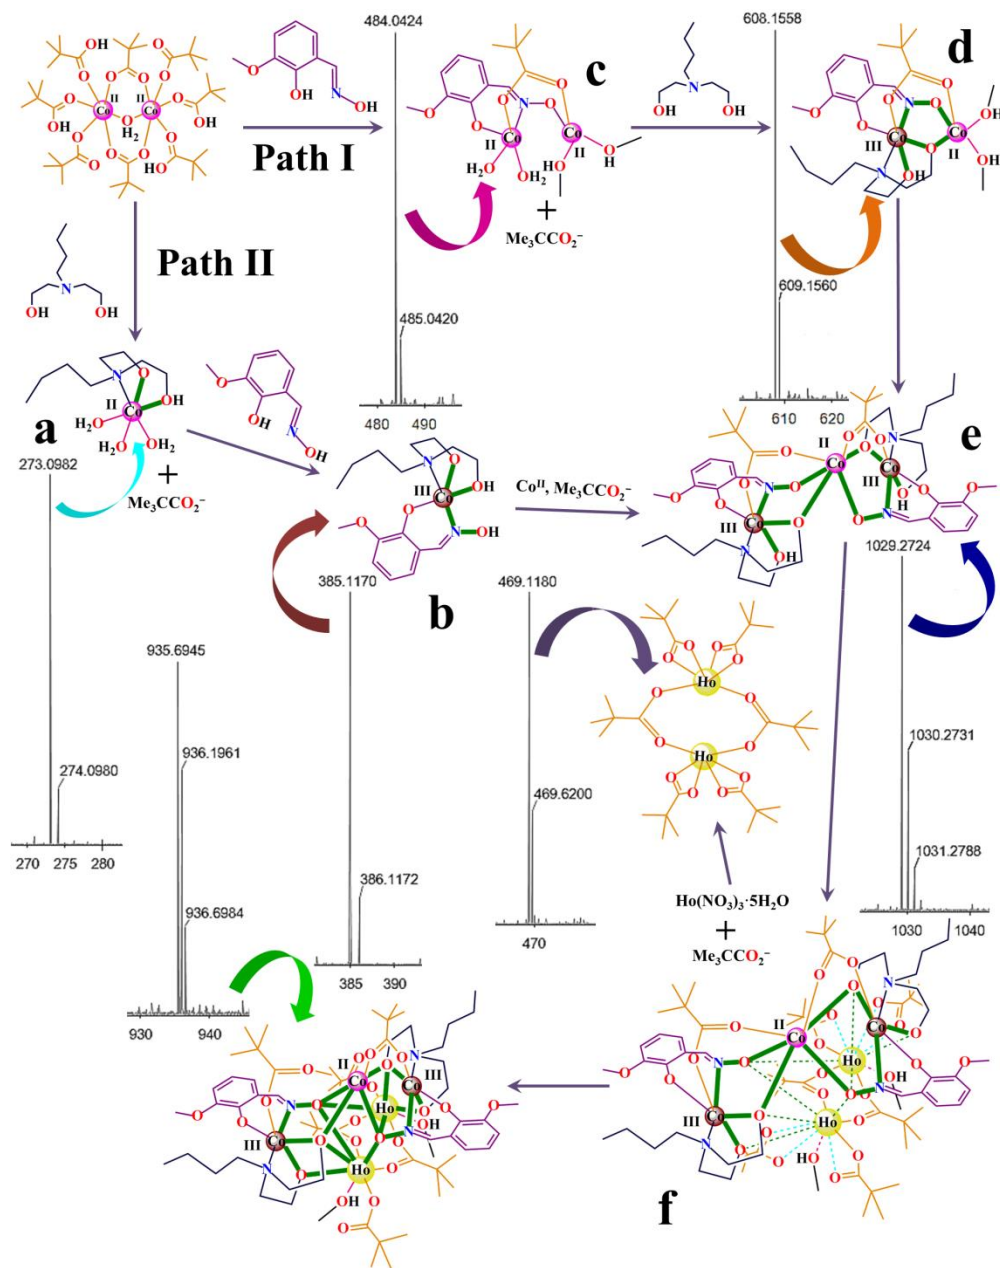

**Scheme S2** Proposed pathway for the formation of **5** in MeOH medium for different order of addition of  $H_2L$  and  $N\text{-BuDEAH}_2$ .

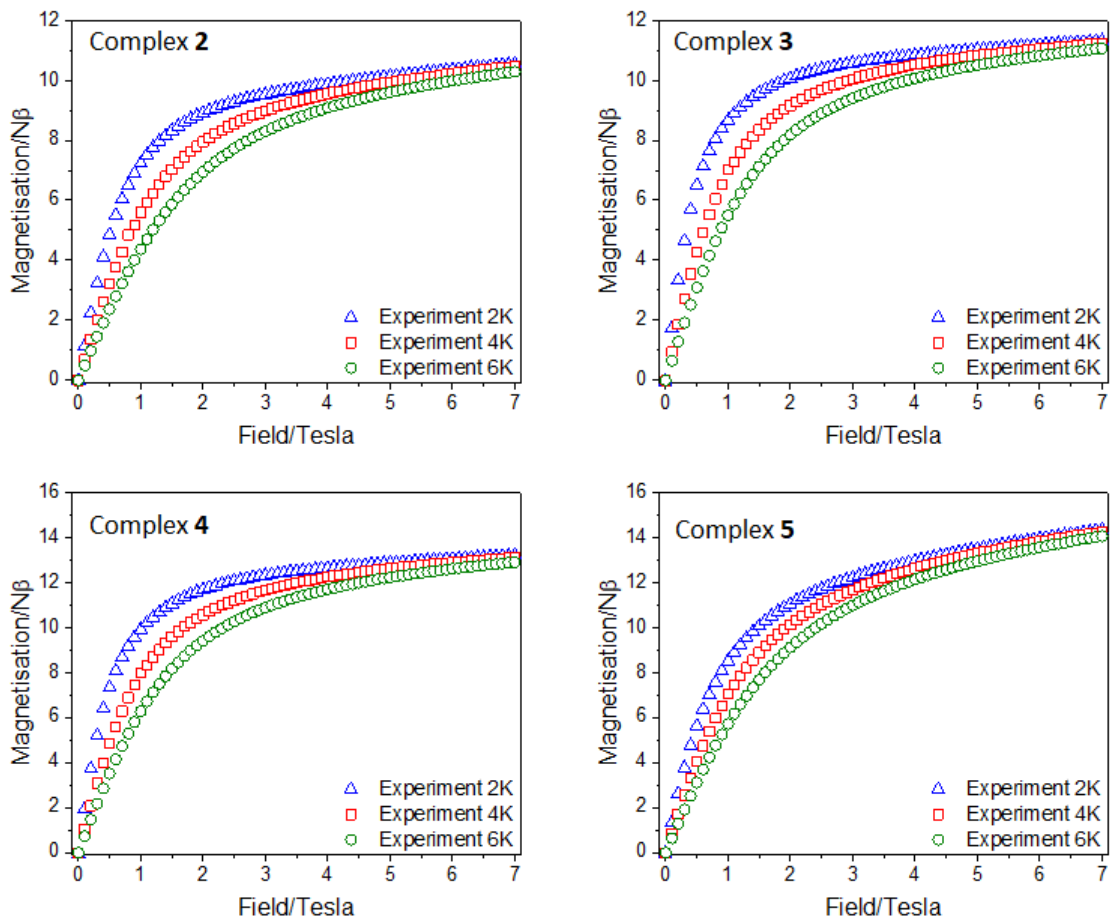

**Fig. S17** Magnetization vs. field data at 2, 4 and 6 K for complexes 2–5.

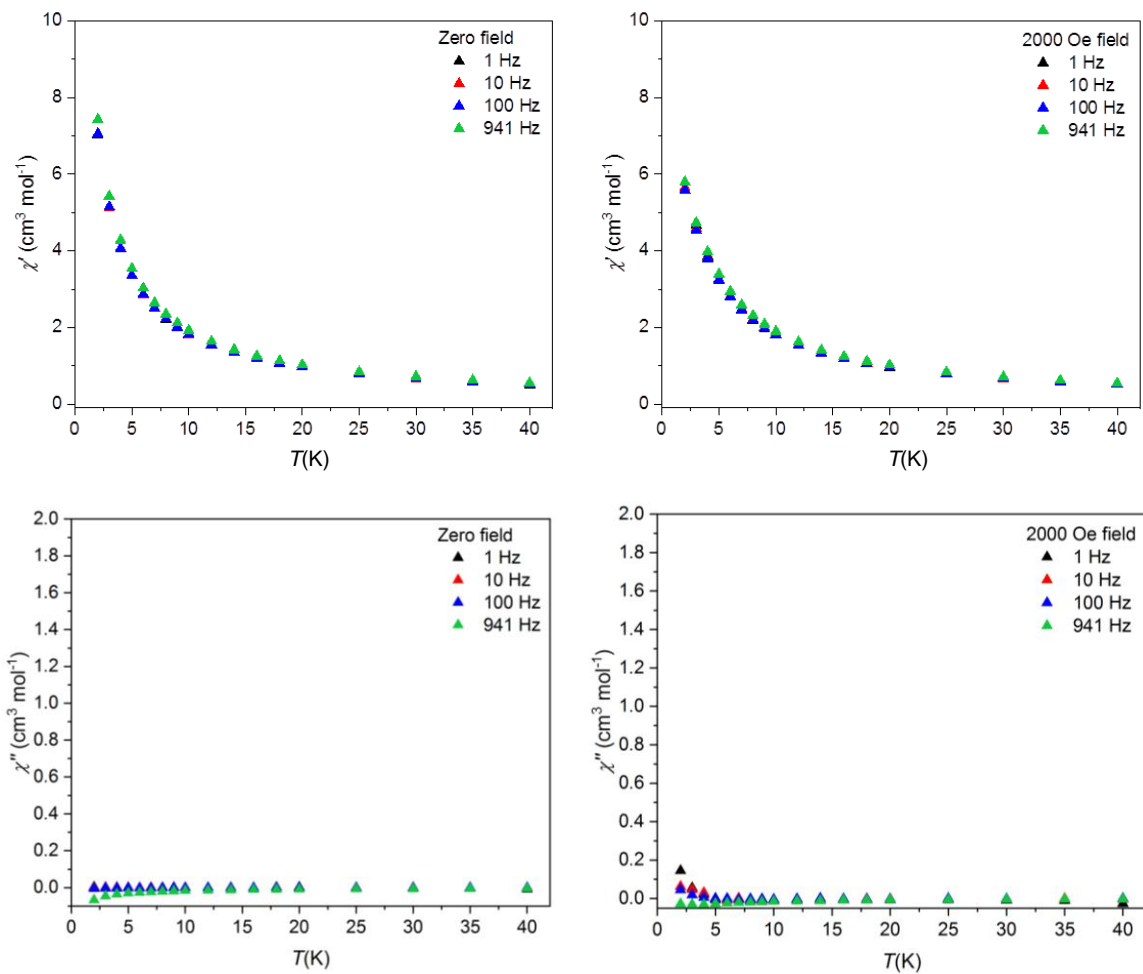

**Fig. S18** The in-phase ( $\chi'$ ) and out-of-phase ( $\chi''$ ) ac susceptibility data for complex **2** in zero dc field (left) and 2000 Oe dc applied field (right).

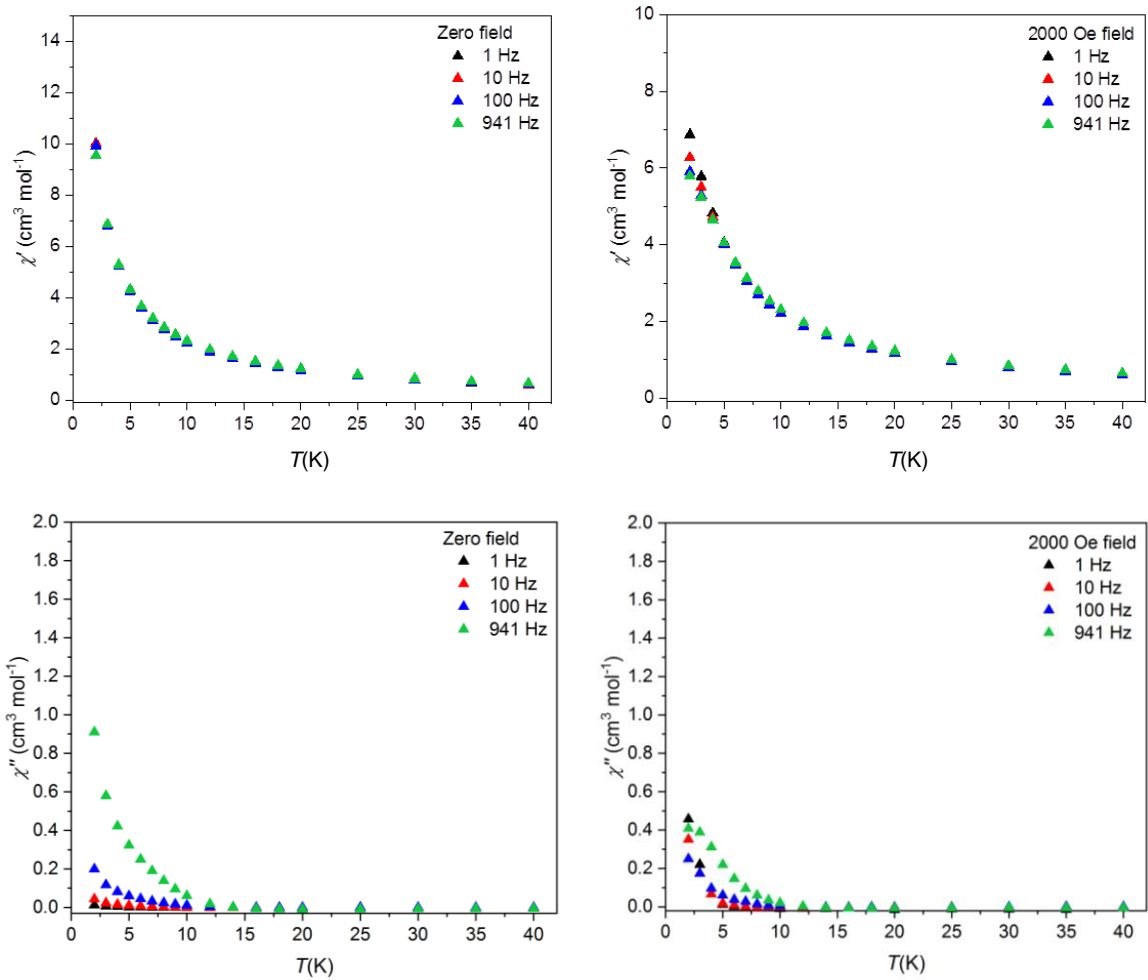

**Fig. S19** The in-phase ( $\chi'$ ) and out-of-phase ( $\chi''$ ) ac susceptibility data for complex **3** in zero dc field (left) and 2000 Oe dc applied field (right).

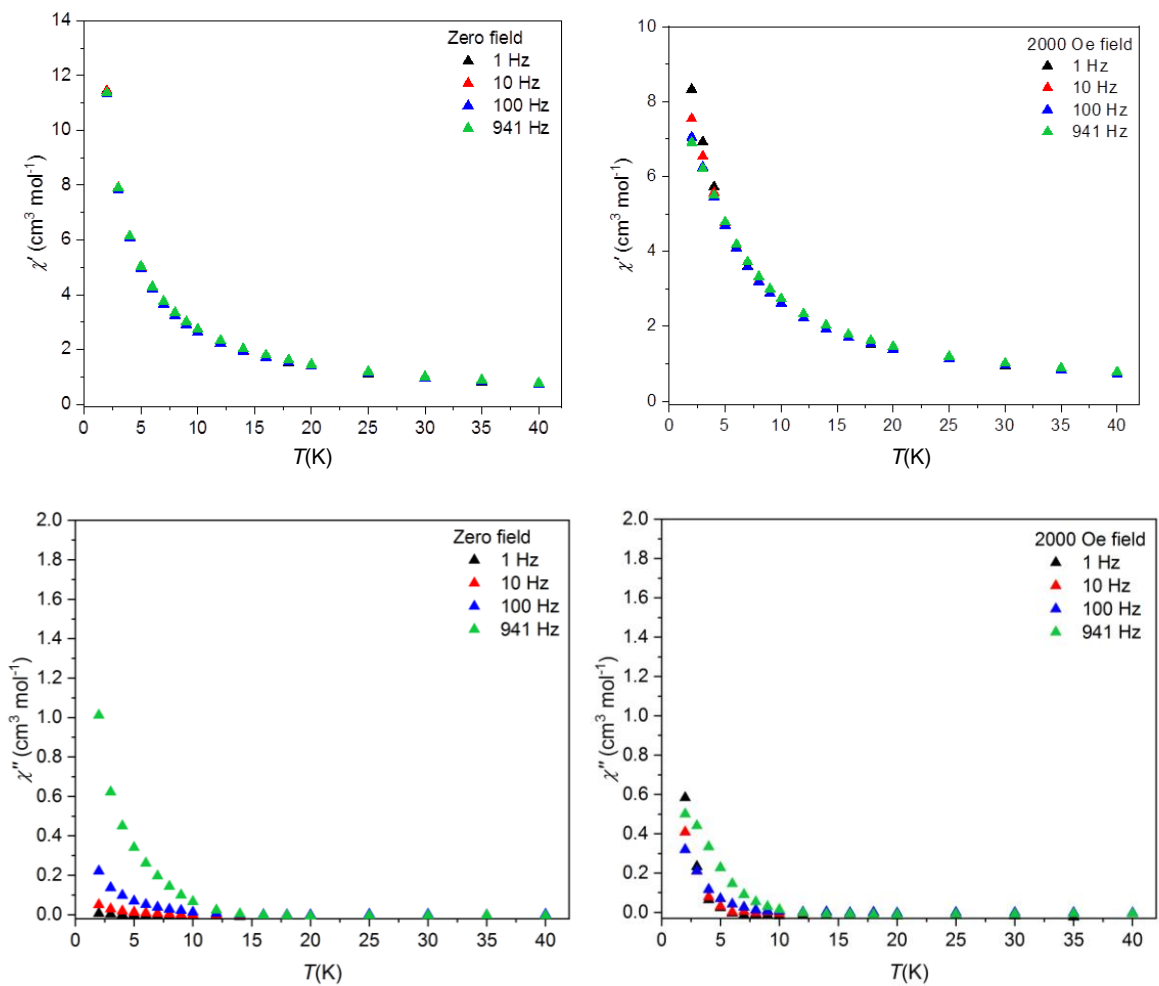

**Fig. S20** The in-phase ( $\chi'$ ) and out-of-phase ( $\chi''$ ) ac susceptibility data for complex **4** in zero dc field (left) and 2000 Oe dc applied field (right).

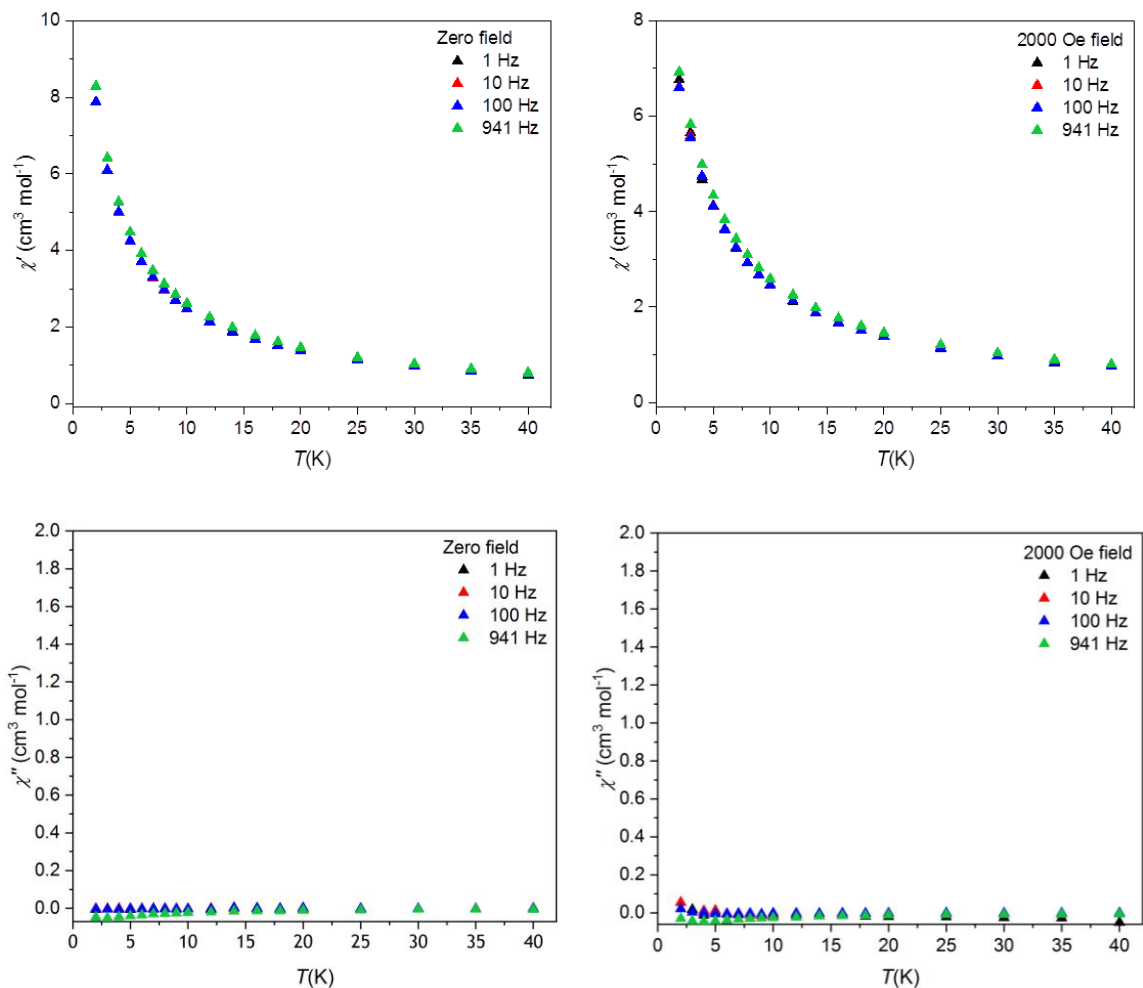

**Fig. S21** The in-phase ( $\chi'$ ) and out-of-phase ( $\chi''$ ) ac susceptibility data for complex **5** in zero dc field (left) and 2000 Oe dc applied field (right).

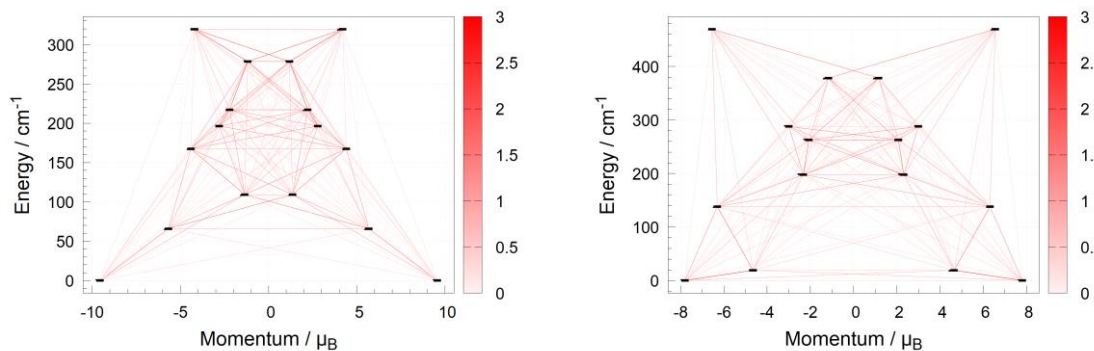

**Fig. S22** Magnetization blocking barrier of  $\text{Dy}^{\text{III}}$  in **3** (left) and **4** (right) calculated by SINGLE\_ANISO, where magnetic relaxation path, outlining the blocking barrier, is traced by the white-red lines scaling the transition magnetic dipole matrix elements between the connected multiplet states.

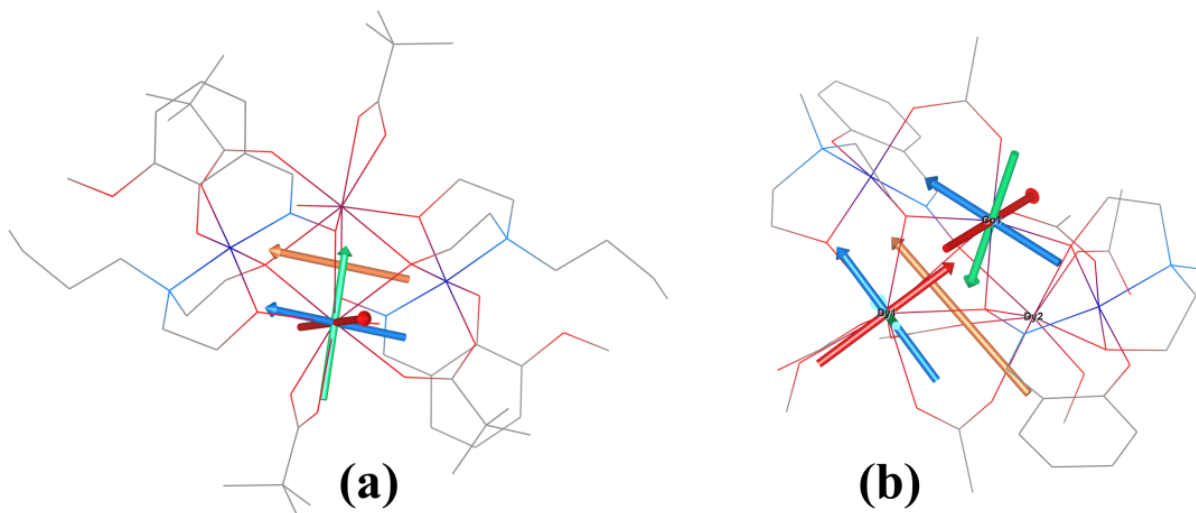

**Fig. S23** The molecular structure of **3** (a) and simplified structure of **4** (b) derived from the experimental X-ray geometry used for CASSCF calculations overlaid with principal axis of  $g$ -tensor of the first Kramers doublet (x/y/z-axes colored as red/green/blue arrows) for  $\text{Dy}^{\text{III}}$  and  $\text{Co}^{\text{II}}$  ions resulting from SINGLE\_ANISO. Note: (a) the first Kramers doublet of  $\text{Dy}^{\text{III}}$  has  $g_x = 0.158$ ,  $g_y = 0.424$ ,  $g_z = 19.117$ , (b) the first Kramers doublet of  $\text{Dy}^{\text{III}}$  has  $g_x = 0.359$ ,  $g_y = 2.296$ ,  $g_z = 15.611$ , the first Kramers doublet of  $\text{Co}^{\text{II}}$  has  $g_x = 2.232$ ,  $g_y = 2.853$ ,  $g_z = 7.405$  ( $S_{\text{eff}} = 1/2$ ).

The orange arrows situated in the center of the complexes represents orientation of  $g_z$  of the (a) second doublet and (b) first Kramers doublet resulting from POLY\_ANISO calculations (Fig. 9 and 10). Note: (a) the first doublet has  $g_x = g_y = g_z = 0.0$ , the second doublet has  $g_x = g_y = 0.0$  and  $g_z = 38.2$ , (b) the first doublet has  $g_x = 0.035$ ,  $g_y = 3.217$ ,  $g_z = 11.724$ .

$$2$$

$$J_{\text{Tb-Tb}}^{\text{exch}} = +0.0020 \text{ cm}^{-1}$$

Scaling factor for  
calculated data: 0.957

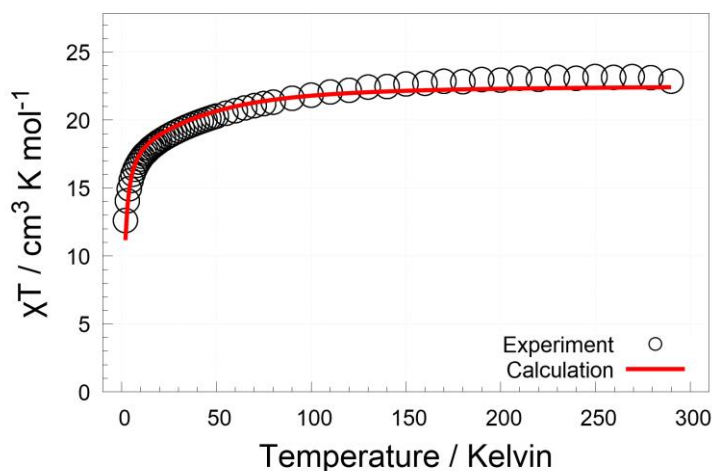

3

$$J_{\text{Dy-Dy}}^{\text{exch}} = +0.122 \text{ cm}^{-1}$$

Scaling factor for  
calculated data: 0.953

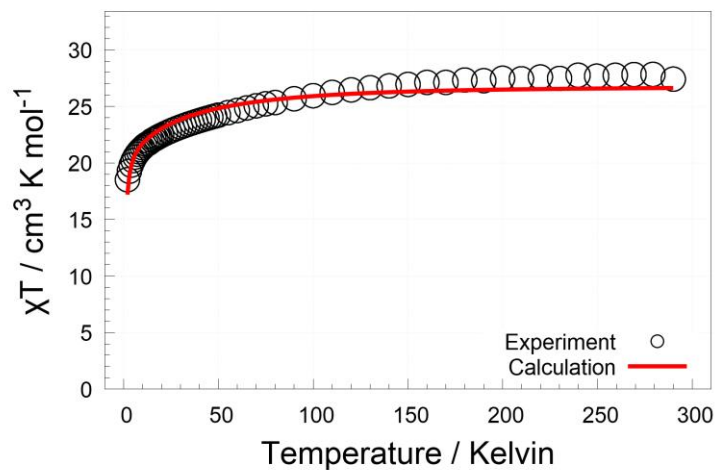

4

$$J_{\text{Co-Dy}}^{\text{exch}} = +3.18 \text{ cm}^{-1}$$

$$J_{\text{Dy-Dy}}^{\text{exch}} = -1.602 \text{ cm}^{-1}$$

Scaling factor for  
calculated data: 1.037

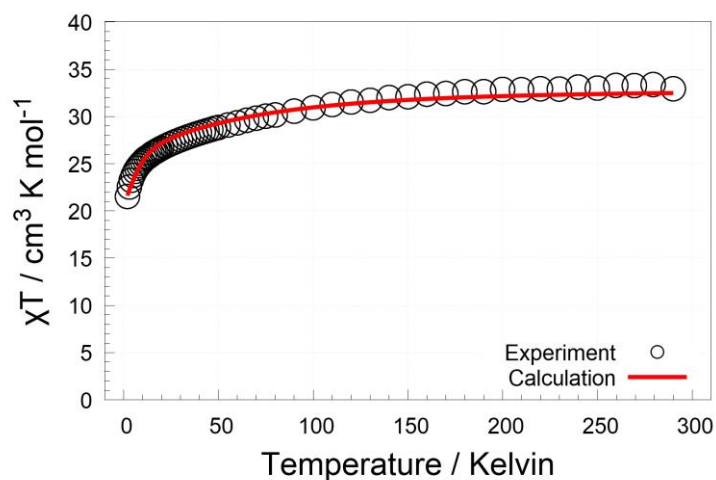

5

$$J_{\text{Co-Ho}}^{\text{exch}} = -0.390 \text{ cm}^{-1}$$

$$J_{\text{Ho-Ho}}^{\text{exch}} = -0.020 \text{ cm}^{-1}$$

Scaling factor for  
calculated data: 1.090

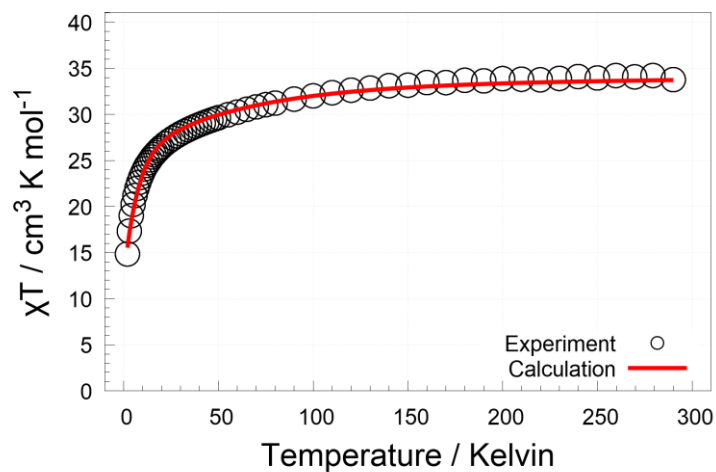

**Fig. S24** The fits of experimental magnetic susceptibility of 2–5 utilizing POLY\_ANISO module.



**Table S1** Important bond lengths (Å) and angles (°) in **1–5**

| Bond lengths (Å) |          |        |          |         |            |
|------------------|----------|--------|----------|---------|------------|
| Complex 1        |          |        |          |         |            |
| Gd1–O7           | 2.361(4) | Gd1–O9 | 2.492(4) | Co1–O4  | 1.904(3)   |
| Gd1–O5           | 2.407(4) | Gd1–O4 | 2.539(3) | Co1–O5  | 1.907(3)   |
| Gd1–O1W          | 2.423(3) | Gd1–O4 | 2.558(4) | Co1–N2  | 1.990(4)   |
| Gd1–O3           | 2.429(3) | Co1–N1 | 1.870(4) | Gd1–Co1 | 3.356(2)   |
| Gd1–O3           | 2.438(3) | Co1–O1 | 1.887(3) | Gd1–Co1 | 3.809(29)  |
| Gd1–O8           | 2.453(3) | Co1–O6 | 1.904(4) | Gd1–Gd1 | 3.4356(17) |
| Complex 2        |          |        |          |         |            |
| Tb1–O7           | 2.324(7) | Tb1–O9 | 2.496(7) | Co1–O5  | 1.913(7)   |
| Tb1–O5           | 2.381(8) | Tb1–O4 | 2.533(7) | Co1–O6  | 1.913(7)   |
| Tb1–O1W          | 2.386(7) | Tb1–O4 | 2.541(7) | Co1–N2  | 1.987(9)   |
| Tb1–O8           | 2.401(7) | Co1–N1 | 1.855(8) | Tb1–Co1 | 3.338(3)   |
| Tb1–O3           | 2.418(7) | Co1–O1 | 1.883(8) | Tb1–Co1 | 3.803(3)   |
| Tb1–O3           | 2.431(7) | Co1–O4 | 1.891(7) | Tb1–Tb1 | 3.436(2)   |
| Complex 3        |          |        |          |         |            |
| Dy1–O7           | 2.319(3) | Dy1–O9 | 2.477(3) | Co1–O4  | 1.899(3)   |
| Dy1–O5           | 2.358(3) | Dy1–O4 | 2.509(3) | Co1–O6  | 1.900(3)   |
| Dy1–O1W          | 2.377(3) | Dy1–O4 | 2.535(3) | Co1–N2  | 1.985(3)   |
| Dy1–O3           | 2.403(3) | Co1–N1 | 1.862(3) | Dy1–Co1 | 3.3166(5)  |
| Dy1–O3           | 2.411(3) | Co1–O1 | 1.887(3) | Dy1–Co1 | 3.7860(1)  |
| Dy1–O8           | 2.441(3) | Co1–O5 | 1.897(3) | Dy1–Dy1 | 3.3962(4)  |
| Complex 4        |          |        |          |         |            |
| Dy1–O8           | 2.260(6) | Co2–O6 | 2.025(7) | Co1–O4  | 2.005(7)   |
| Dy1–O5           | 2.306(6) | Co2–O4 | 2.049(5) | Co1–Co2 | 3.2910(11) |
| Dy1–O10          | 2.309(6) | Co2–O3 | 2.102(5) | Dy1–Co1 | 3.3002(14) |
| Dy1–O9           | 2.352(5) | Co1–O1 | 1.881(7) | Dy1–Co1 | 5.1624(13) |
| Dy1–O12          | 2.365(5) | Co1–O5 | 1.880(6) | Dy1–Co2 | 3.3775(15) |

|                        |            |            |            |            |            |
|------------------------|------------|------------|------------|------------|------------|
| Dy1–O3                 | 2.422(5)   | Co1–N1     | 1.893(6)   | Dy1–Dy1    | 3.8129(15) |
| Dy1–O4                 | 2.537(5)   | Co1–O7     | 1.917(6)   |            |            |
| Dy1–O3                 | 2.583(5)   | Co1–N2B    | 2.004(17)  |            |            |
| <b>Complex 5</b>       |            |            |            |            |            |
| Ho1 – O8               | 2.241(7)   | Co2–O6     | 2.007(8)   | Co1–N2B    | 2.01(3)    |
| Ho1 – O10              | 2.282(7)   | Co2–O4     | 2.047(5)   | Co1–Co2    | 3.2745(6)  |
| Ho1 – O5               | 2.284(6)   | Co2–O3     | 2.089(6)   | Ho1–Co1    | 5.1370(7)  |
| Ho1 – O9               | 2.333(6)   | Co1 – O1   | 1.872(7)   | Ho1–Co1    | 3.2729(14) |
| Ho1 – O12              | 2.347(6)   | Co1 – O5   | 1.877(6)   | Ho1–Co2    | 3.3623(14) |
| Ho1 – O3               | 2.403(6)   | Co1 – N1   | 1.882(7)   | Ho1–Ho1    | 3.7887(10) |
| Ho1 – O4               | 2.527(5)   | Co1 – O7   | 1.907(7)   |            |            |
| Ho1 – O3               | 2.553(6)   | Co1 – O4   | 1.985(7)   |            |            |
| <b>Bond angles (°)</b> |            |            |            |            |            |
| <b>Complex 1</b>       |            |            |            |            |            |
| O7–Gd1–O5              | 146.68(12) | O3–Gd1–O9  | 143.54(11) | O1–Co1–O6  | 88.33(15)  |
| O7–Gd1–O1W             | 79.31(12)  | O8–Gd1–O9  | 52.71(11)  | N1–Co1–O4  | 89.79(16)  |
| O5–Gd1–O1W             | 86.47(12)  | O7–Gd1–O4  | 142.83(11) | O1–Co1–O4  | 178.37(15) |
| O7–Gd1–O3              | 83.35(12)  | O5–Gd1–O4  | 64.04(11)  | O6–Co1–O4  | 93.29(14)  |
| O5–Gd1–O3              | 123.01(12) | O1W–Gd1–O4 | 134.94(11) | N1–Co1–O5  | 89.28(16)  |
| O1–Gd1–O3              | 144.14(12) | O3–Gd1–O4  | 60.32(10)  | O1–Co1–O5  | 91.29(15)  |
| O7–Gd1–O3              | 129.34(12) | O3–Gd1–O4  | 63.12(11)  | O6–Co1–O5  | 177.71(15) |
| O5–Gd1–O3              | 75.15(11)  | O8–Gd1–O4  | 85.04(11)  | O4–Co1–O5  | 87.08(14)  |
| O1–Gd1–O3              | 77.33(12)  | O9–Gd1–O4  | 123.59(12) | N1–Co1–N2  | 175.13(17) |
| O3–Gd1–O3              | 90.20(11)  | O7–Gd1–O4  | 72.73(12)  | O1–Co1–N2  | 91.13(17)  |
| O7–Gd1–O8              | 78.32(12)  | O5–Gd1–O4  | 135.03(11) | O6–Co1–N2  | 91.73(16)  |
| O5–Gd1–O8              | 88.23(12)  | O1W–Gd1–O4 | 81.92(12)  | O4–Co1–N2  | 88.73(16)  |
| O1–Gd1–O8              | 129.61(12) | O3–Gd1–O4  | 62.95(11)  | O5–Co1–N2  | 86.02(16)  |
| O3–Gd1–O8              | 75.97(12)  | O3–Gd1–O4  | 59.94(11)  | Co1–O5–Gd1 | 101.52(14) |
| O3–Gd1–O8              | 147.96(11) | O8–Gd1–O4  | 131.56(11) | Gd1–O3–Gd1 | 89.80(11)  |

|            |            |            |            |            |            |
|------------|------------|------------|------------|------------|------------|
| O7-Gd1-O9  | 69.97(13)  | O9-Gd1-O4  | 139.89(11) | Co1-O4-Gd1 | 97.05(13)  |
| O5-Gd1-O9  | 77.59(12)  | O4-Gd1-O4  | 95.25(10)  | Co1-O4-Gd1 | 116.45(15) |
| O1W-Gd1-O9 | 77.26(12)  | N1-Co1-O1  | 90.22(17)  | Gd1-O4-Gd1 | 84.75(10)  |
| O3-Gd1-O9  | 125.20(11) | N1-Co1-O6  | 92.98(16)  |            |            |
| Complex 2  |            |            |            |            |            |
| O7-Tb1-O5  | 146.1(3)   | O3-Tb1-O9  | 126.0(2)   | O1-Co1-O4  | 178.5(3)   |
| O7-Tb1-O1W | 78.8(3)    | O3-Tb1-O9  | 143.3(2)   | N1-Co1-O5  | 89.1(3)    |
| O5-Tb1-O1W | 86.3(3)    | O7-Tb1-O4  | 143.2(2)   | O1-Co1-O5  | 91.2(3)    |
| O7-Tb1-O8  | 77.8(3)    | O5-Tb1-O4  | 64.6(2)    | O4-Co1-O5  | 87.4(3)    |
| O5-Tb1-O8  | 88.7(3)    | O1W-Tb1-O4 | 134.9(2)   | N1-Co1-O6  | 93.2(3)    |
| O1W-Tb1-O8 | 128.9(2)   | O8-Tb1-O4  | 86.2(2)    | O1-Co1-O6  | 89.0(3)    |
| O7-Tb1-O3  | 83.8(2)    | O3-Tb1-O4  | 60.2(2)    | O4-Co1-O6  | 92.4(3)    |
| O5-Tb1-O3  | 123.4(2)   | O3-Tb1-O4  | 62.6(2)    | O5-Co1-O6  | 177.7(3)   |
| O1W-Tb1-O3 | 144.0(3)   | O9-Tb1-O4  | 124.4(2)   | N1-Co1-N2  | 175.2(3)   |
| O8-Tb1-O3  | 76.3(2)    | O7-Tb1-O4  | 72.7(3)    | O1-Co1-N2  | 90.4(4)    |
| O7-Tb1-O3  | 129.2(3)   | O5-Tb1-O4  | 135.4(2)   | O4-Co1-N2  | 89.9(3)    |
| O5-Tb1-O3  | 75.5(3)    | O1W-Tb1-O4 | 82.2(2)    | O5-Co1-N2  | 86.3(3)    |
| O1W-Tb1-O3 | 77.7(2)    | O8-Tb1-O4  | 131.1(3)   | O6-Co1-N2  | 91.4(3)    |
| O8-Tb1-O3  | 148.6(2)   | O3-Tb1-O4  | 62.6(2)    | Co1-O5-Tb1 | 101.5(3)   |
| O3-Tb1-O3  | 89.8(2)    | O3-Tb1-O4  | 59.9(2)    | Tb1-O3-Tb1 | 90.2(2)    |
| O7-Tb1-O9  | 69.8(3)    | O9-Tb1-O4  | 139.7(2)   | Co1-O4-Tb1 | 96.9(3)    |
| O5-Tb1-O9  | 77.1(3)    | O4-Tb1-O4  | 94.8(2)    | Co1-O4-Tb1 | 117.4(3)   |
| O1W-Tb1-O9 | 76.5(2)    | N1-Co1-O1  | 90.8(4)    | Tb1-O4-Tb1 | 85.2(2)    |
| O8-Tb1-O9  | 52.9(2)    | N1-Co1-O4  | 88.7(3)    |            |            |
| Complex 3  |            |            |            |            |            |
| O7-Dy1-O5  | 145.97(10) | O3-Dy1-O9  | 143.04(10) | O1-Co1-O5  | 91.20(12)  |
| O7-Dy1-O1W | 79.57(10)  | O8-Dy1-O9  | 52.86(10)  | N1-Co1-O4  | 90.06(13)  |
| O5-Dy1-O1W | 85.69(10)  | O7-Dy1-O4  | 143.12(10) | O1-Co1-O4  | 177.66(13) |
| O7-Dy1-O3  | 83.61(10)  | O5-Dy1-O4  | 64.49(9)   | O5-Co1-O4  | 86.47(12)  |

|                  |            |            |            |            |            |
|------------------|------------|------------|------------|------------|------------|
| O5-Dy1-O3        | 123.36(10) | O1W-Dy1-O4 | 134.48(9)  | N1-Co1-O6  | 92.52(13)  |
| O1W-Dy1-O3       | 144.65(10) | O3-Dy1-O4  | 60.32(9)   | O1-Co1-O6  | 89.17(12)  |
| O7-Dy1-O3        | 129.03(10) | O3-Dy1-O4  | 63.30(9)   | O5-Co1-O6  | 177.89(12) |
| O5-Dy1-O3        | 75.80(9)   | O8-Dy1-O4  | 85.44(9)   | O4-Co1-O6  | 93.17(12)  |
| O1W-Dy1-O3       | 77.00(10)  | O9-Dy1-O4  | 123.74(10) | N1-Co1-N2  | 174.93(14) |
| O3-Dy1-O3        | 90.24(9)   | O7-Dy1-O4  | 72.64(9)   | O1-Co1-N2  | 91.30(14)  |
| O7-Dy1-O8        | 78.23(10)  | O5-Dy1-O4  | 135.58(9)  | O5-Co1-N2  | 85.45(13)  |
| O5-Dy1-O8        | 88.02(9)   | O1W-Dy1-O4 | 82.28(10)  | O4-Co1-N2  | 88.78(13)  |
| O1W-Dy1-O8       | 129.22(10) | O3-Dy1-O4  | 63.02(9)   | O6-Co1-N2  | 92.47(13)  |
| O3-Dy1-O8        | 76.21(10)  | O3-Dy1-O4  | 59.85(9)   | Co1-O5-Dy1 | 101.87(12) |
| O3-Dy1-O8        | 148.53(10) | O8-Dy1-O4  | 131.60(9)  | Dy1-O3-Dy1 | 89.76(9)   |
| O7-Dy1-O9        | 70.10(10)  | O9-Dy1-O4  | 139.80(9)  | Co1-O4-Dy1 | 96.64(12)  |
| O5-Dy1-O9        | 76.75(9)   | O4-Dy1-O4  | 95.34(8)   | Co1-O4-Dy1 | 116.57(12) |
| O1W-Dy1-O9       | 76.71(10)  | N1-Co1-O1  | 89.65(14)  | Dy1-O4-Dy1 | 84.66(8)   |
| O3-Dy1-O9        | 125.72(9)  | N1-Co1-O5  | 89.56(13)  |            |            |
| <b>Complex 4</b> |            |            |            |            |            |
| O8-Dy1-O5        | 84.7(2)    | O3-Dy1-O4  | 71.46(18)  | O5-Co1-O7  | 177.1(2)   |
| O8-Dy1-O10       | 154.64(19) | O8-Dy1-O3  | 71.98(17)  | O1-Co1-O7  | 88.3(3)    |
| O5-Dy1-O10       | 103.0(2)   | O5-Dy1-O3  | 80.30(19)  | N1-Co1-O7  | 91.5(3)    |
| O8-Dy1-O9        | 79.5(2)    | O10-Dy1-O3 | 132.81(18) | O5-Co1-N2B | 91.0(6)    |
| O5-Dy1-O9        | 153.8(2)   | O9-Dy1-O3  | 113.76(18) | O1-Co1-N2B | 98.1(6)    |
| O10-Dy1-O9       | 83.9(2)    | O12-Dy1-O3 | 147.4(2)   | N1-Co1-N2B | 169.7(6)   |
| O8-Dy1-O12       | 81.4(2)    | O3-Dy1-O3  | 58.1(2)    | O7-Co1-N2B | 86.1(6)    |
| O5-Dy1-O12       | 78.82(19)  | O4-Dy1-O3  | 61.02(14)  | O5-Co1-O4  | 84.6(3)    |
| O10-Dy1-O12      | 76.6(2)    | O6-Co2-O6  | 98.1(4)    | O1-Co1-O4  | 175.2(2)   |
| O9-Dy1-O12       | 78.29(18)  | O6-Co2-O4  | 95.6(3)    | N1-Co1-O4  | 91.8(3)    |
| O8-Dy1-O3        | 104.16(18) | O6-Co2-O4  | 95.5(3)    | O7-Co1-O4  | 94.8(3)    |
| O5-Dy1-O3        | 130.57(19) | O4-Co2-O4  | 163.0(3)   | N2B-Co1-O4 | 78.5(5)    |
| O10-Dy1-O3       | 89.3(2)    | O6-Co2-O3  | 165.0(2)   | Co1-O4-Co2 | 108.5(2)   |

|             |            |            |           |            |           |
|-------------|------------|------------|-----------|------------|-----------|
| O9-Dy1-O3   | 74.03(17)  | O6-Co2-O3  | 95.9(2)   | Co1-O4-Dy1 | 92.5(2)   |
| O12-Dy1-O3  | 150.08(19) | O4-Co2-O3  | 77.5(2)   | Co2-O4-Dy1 | 94.26(18) |
| O8-Dy1-O4   | 126.90(18) | O4-Co2-O3  | 88.5(2)   | Co2-O3-Dy1 | 96.3(2)   |
| O5-Dy1-O4   | 65.2(2)    | O3-Co2-O3  | 70.8(3)   | Co2-O3-Dy1 | 91.69(19) |
| O10-Dy1-O4  | 77.55(17)  | O5-Co1-O1  | 92.1(3)   | Dy1-O3-Dy1 | 99.2(2)   |
| O9-Dy1-O4   | 140.7(2)   | O5-Co1-N1  | 91.4(3)   | Co1-O5-Dy1 | 103.6(3)  |
| O12-Dy1-O4  | 128.81(18) | O1-Co1-N1  | 91.8(3)   |            |           |
| Complex 5   |            |            |           |            |           |
| O8-Ho1-O10  | 154.5(2)   | O3-Ho1-O4  | 71.63(19) | O1-Co1-O7  | 88.5(3)   |
| O8-Ho1-O5   | 84.8(2)    | O8-Ho1-O3  | 72.23(19) | O5-Co1-O7  | 177.5(3)  |
| O10-Ho1-O5  | 103.0(2)   | O10-Ho1-O3 | 132.6(2)  | N1-Co1-O7  | 91.5(3)   |
| O8-Ho1-O9   | 79.1(2)    | O5-Ho1-O3  | 80.9(2)   | O1-Co1-O4  | 175.3(2)  |
| O10-Ho1-O9  | 83.9(2)    | O9-Ho1-O3  | 113.6(2)  | O5-Co1-O4  | 84.9(3)   |
| O5-Ho1-O9   | 153.3(2)   | O12-Ho1-O3 | 147.7(2)  | N1-Co1-O4  | 91.6(3)   |
| O8-Ho1-O12  | 81.3(2)    | O3-Ho1-O3  | 57.5(3)   | O7-Co1-O4  | 94.5(3)   |
| O10-Ho1-O12 | 76.7(2)    | O4-Ho1-O3  | 61.28(16) | O1-Co1-N2B | 96.9(8)   |
| O5-Ho1-O12  | 78.5(2)    | O6-Co2-O6  | 98.0(4)   | O5-Co1-N2B | 91.7(9)   |
| O9-Ho1-O12  | 78.1(2)    | O6-Co2-O4  | 95.5(3)   | N1-Co1-N2B | 170.8(8)  |
| O8-Ho1-O3   | 103.8(2)   | O6-Co2-O4  | 95.6(3)   | O7-Co1-N2B | 85.7(9)   |
| O10-Ho1-O3  | 89.5(2)    | O4-Co2-O4  | 163.0(3)  | O4-Co1-N2B | 79.9(8)   |
| O5-Ho1-O3   | 130.8(2)   | O6-Co2-O3  | 164.4(3)  | Co1-O4-Co2 | 108.6(2)  |
| O9-Ho1-O3   | 74.23(19)  | O6-Co2-O3  | 96.5(3)   | Co1-O4-Ho1 | 92.2(2)   |
| O12-Ho1-O3  | 150.2(2)   | O4-Co2-O3  | 88.5(2)   | Co2-O4-Ho1 | 94.03(19) |
| O8-Ho1-O4   | 127.3(2)   | O4-Co2-O3  | 77.5(2)   | Co2-O3-Ho1 | 96.7(3)   |
| O10-Ho1-O4  | 77.30(19)  | O3-Co2-O3  | 69.7(4)   | Co2-O3-Ho1 | 92.3(2)   |
| O5-Ho1-O4   | 65.4(2)    | O1-Co1-O5  | 91.9(3)   | Ho1-O3-Ho1 | 99.7(2)   |
| O9-Ho1-O4   | 140.9(2)   | O1-Co1-N1  | 91.9(3)   | Co1-O5-Ho1 | 103.3(3)  |
| O12-Ho1-O4  | 128.65(19) | O5-Co1-N1  | 90.9(3)   |            |           |

**Table S2** Continuous Shape Measures calculation for Ln<sup>III</sup> in 1–5

-----  
 S H A P E v2.1 Continuous Shape Measures calculation  
 (c) 2013 Electronic Structure Group, Universitat de Barcelona  
 Contact: llunell@ub.edu  
 -----

|                    |        |                                    |                    |        |                                            |
|--------------------|--------|------------------------------------|--------------------|--------|--------------------------------------------|
| [ML <sub>9</sub> ] |        |                                    | [ML <sub>8</sub> ] |        |                                            |
| EP-9               | 1 D9h  | Enneagon                           | OP-8               | 1 D8h  | Octagon                                    |
| OPY-9              | 2 C8v  | Octagonal pyramid                  | HPY-8              | 2 C7v  | Heptagonal pyramid                         |
| HBPY-9             | 3 D7h  | Heptagonal bipyramid               | HBPY-8             | 3 D6h  | Hexagonal bipyramid                        |
| JTC-9              | 4 C3v  | Johnson triangular cupola J3       | CU-8               | 4 Oh   | Cube                                       |
| JCCU-9             | 5 C4v  | Capped cube J8                     | SAPR-8             | 5 D4d  | Square antiprism                           |
| CCU-9              | 6 C4v  | Spherical-relaxed capped cube      | TDD-8              | 6 D2d  | Triangular dodecahedron                    |
| JCSAPR-9           | 7 C4v  | Capped square antiprism J10        | JGBF-8             | 7 D2d  | Johnson gyrobifastigium J26                |
| CSAPR-9            | 8 C4v  | Spherical capped square antiprism  | JETBPY-8           | 8 D3h  | Johnson elongated triangular bipyramid J14 |
| JTCTPR-9           | 9 D3h  | Tricapped trigonal prism J51       | JBTPR-8            | 9 C2v  | Biaugmented trigonal prism J50             |
| TCTPR-9            | 10 D3h | Spherical tricapped trigonal prism | BTPR-8             | 10 C2v | Biaugmented trigonal prism                 |
| JTDIC-9            | 11 C3v | Tridiminished icosahedron J63      | JSD-8              | 11 D2d | Snub diphenoid J84                         |
| HH-9               | 12 C2v | Hula-hoop                          | TT-8               | 12 Td  | Triakis tetrahedron                        |
| MFF-9              | 13 Cs  | Muffin                             | ETBPY-8            | 13 D3h | Elongated trigonal bipyramid               |

|                              | Complex 1           | Complex 2           | Complex 3           |                              | Complex 4           | Complex 5           |
|------------------------------|---------------------|---------------------|---------------------|------------------------------|---------------------|---------------------|
| Structure [ML <sub>9</sub> ] | Gd1                 | Tb1                 | Dy1                 | Structure [ML <sub>8</sub> ] | Dy1                 | Ho1                 |
| EP-9                         | 33.368              | 33.282              | 33.353              | OP-8                         | 30.969              | 31.101              |
| OPY-9                        | 22.107              | 22.149              | 22.260              | HPY-8                        | 21.322              | 21.346              |
| HBPY-9                       | 17.100              | 17.173              | 17.093              | HBPY-8                       | 14.016              | 13.934              |
| JTC-9                        | 14.618              | 14.669              | 14.562              | CU-8                         | 10.766              | 10.71               |
| JCCU-9                       | 7.743               | 7.480               | 7.491               | SAPR-8                       | <b><u>1.491</u></b> | <b><u>1.511</u></b> |
| CCU-9                        | 6.574               | 6.471               | 6.411               | TDD-8                        | 1.988               | 2.003               |
| JCSAPR-9                     | 2.588               | 2.514               | 2.521               | JGBF-8                       | 13.314              | 13.24               |
| CSAPR-9                      | 1.570               | 1.634               | 1.586               | JETBPY-8                     | 26.626              | 26.652              |
| JTCTPR-9                     | 3.524               | 3.462               | 3.461               | JBTPR-8                      | 2.194               | 2.191               |
| TCTPR-9                      | 2.763               | 2.837               | 2.760               | BTPR-8                       | 2.069               | 2.112               |
| JTDIC-9                      | 12.866              | 12.930              | 12.830              | JSD-8                        | 3.465               | 3.463               |
| HH-9                         | 10.620              | 10.707              | 10.542              | TT-8                         | 11.586              | 11.539              |
| MFF-9                        | <b><u>1.311</u></b> | <b><u>1.388</u></b> | <b><u>1.369</u></b> | ETBPY-8                      | 23.607              | 23.601              |

**Table S3** Continuous Shape Measures calculation for Co<sup>II/III</sup> in **1–5**

-----  
 S H A P E v2.1      Continuous Shape Measures calculation  
 (c) 2013 Electronic Structure Group, Universitat de Barcelona  
 Contact: llunell@ub.edu  
 -----

[ML<sub>6</sub>]  
 HP-6    1 D6h    Hexagon  
 PPY-6   2 C5v    Pentagonal pyramid  
 OC-6    3 Oh      Octahedron  
 TPR-6   4 D3h    Trigonal prism  
 JPPY-6  5 C5v    Johnson pentagonal pyramid J2

|                              | Complex 1           | Complex 2           | Complex 3           | Complex 4           |                     | Complex 5           |                     |
|------------------------------|---------------------|---------------------|---------------------|---------------------|---------------------|---------------------|---------------------|
| Structure [ML <sub>6</sub> ] | Co1                 | Co1                 | Co1                 | Co1                 | Co2                 | Co1                 | Co2                 |
| HP-6                         | 32.486              | 32.414              | 32.426              | 29.656              | 29.392              | 29.851              | 29.222              |
| PPY-6                        | 28.994              | 29.072              | 29.177              | 25.899              | 25.311              | 26.298              | 25.072              |
| OC-6                         | <b><u>0.092</u></b> | <b><u>0.087</u></b> | <b><u>0.101</u></b> | <b><u>0.436</u></b> | <b><u>1.103</u></b> | <b><u>0.363</u></b> | <b><u>1.179</u></b> |
| TPR-6                        | 16.086              | 15.886              | 16.154              | 14.051              | 15.167              | 14.351              | 15.13               |
| JPPY-6                       | 32.461              | 32.537              | 32.624              | 29.417              | 29.525              | 29.783              | 29.265              |

**Table S4** Hydrogen bonding parameters for **1–5**

| Interactions    | Type of H-bond | D–H (Å) | D···A (Å)  | H···A (Å) | D–H···A (Å) |
|-----------------|----------------|---------|------------|-----------|-------------|
| Complex 1       |                |         |            |           |             |
| O6WA···O1       | Inter          | –       | 2.9016(17) | –         | –           |
| O6WA···O2       | Inter          | –       | 3.0030(16) | –         | –           |
| O6WA···O5W      | Inter          | –       | 2.5330(18) | –         | –           |
| O5W–H5WA···O1   | Inter          | 0.85    | 2.9887(14) | 3.00      | 80          |
| O5W–H5WA···O2W  | Inter          | 0.85    | 2.8632(21) | 2.18      | 136         |
| O5W–H5WB···O5   | Inter          | 0.85    | 2.9473(15) | 2.74      | 95          |
| O5W–H5WB···O4W  | Inter          | 0.85    | 3.0639(16) | 2.32      | 146         |
| O4W–H4WB···O6WA | Inter          | 0.85    | 2.8776(18) | 2.66      | 96          |
| O3W–H3WB···O4W  | Inter          | 0.85    | 2.3555(15) | 1.54      | 158         |
| O3W–H3WA···O9   | Inter          | 0.85    | 2.7105(13) | 1.88      | 165         |
| O10–H10···O3W   | Inter          | 0.82    | 2.8843(17) | 2.06      | 179         |

|                  |       |      |            |      |     |
|------------------|-------|------|------------|------|-----|
| O1W-H1WA...O3W   | Inter | 0.86 | 2.8187(14) | 1.96 | 172 |
| O1W-H1WB...O2W   | Inter | 0.86 | 2.7275(12) | 1.92 | 154 |
| O2W-H2WB...O8    | Inter | 0.85 | 2.8155(14) | 1.97 | 171 |
| O10...O10        | Inter | -    | 2.749      | -    | -   |
| <b>Complex 2</b> |       |      |            |      |     |
| O6W-H6WA...O1    | Inter | 0.87 | 3.0529(19) | 2.37 | 135 |
| O6W-H6WA...O2    | Inter | 0.87 | 2.9569(22) | 2.15 | 153 |
| O6W-H6WB...O5W   | Inter | 0.87 | 3.0168(19) | 2.54 | 114 |
| O5W-H5WA...O1    | Inter | 0.87 | 3.0192(21) | 2.47 | 121 |
| O5W-H5WA...O5    | Inter | 0.87 | 2.9025(19) | 2.06 | 163 |
| O5W-H5WB...O2W   | Inter | 0.87 | 2.9029(18) | 2.15 | 143 |
| O4W-H4WB...O6W   | Inter | 0.87 | 2.7255(18) | 2.17 | 121 |
| O4W-H4WA...O5W   | Inter | 0.87 | 2.9555(21) | 2.75 | 94  |
| O3W-H3WB...O4W   | Inter | 0.87 | 2.6470(16) | 1.80 | 164 |
| O3W-H2WA...O9    | Inter | 0.87 | 2.6907(18) | 1.87 | 156 |
| O10-H10...O3W    | Inter | 0.84 | 2.7910(22) | 1.95 | 174 |
| O1W-H1WA...O3W   | Inter | 0.87 | 2.8002(16) | 2.38 | 109 |
| O1W-H1WB...O2W   | Inter | 0.87 | 2.7004(16) | 2.54 | 91  |
| O2W-H2WA...O8    | Inter | 0.87 | 2.8067(20) | 1.97 | 161 |
| O10...O10        | Inter | -    | 2.694      | -    | -   |
| <b>Complex 3</b> |       |      |            |      |     |
| O1W-H1WA...O11   | Inter | 0.87 | 2.8723(1)  | 2.02 | 166 |
| O1W-H1WB...O2W   | Inter | 0.87 | 2.7155(1)  | 1.87 | 161 |
| O11-H11...O9     | Inter | 0.82 | 2.6665(1)  | 1.89 | 156 |
| O10-H10...O11    | Inter | 0.82 | 2.8210(1)  | 2.75 | 86  |
| O2W-H2WB...O12   | Inter | 0.85 | 2.8307(1)  | 2.01 | 161 |
| O2W-H2WA...O8    | Inter | 0.85 | 2.8208(1)  | 1.97 | 179 |
| O12-H12...O1     | Inter | 0.82 | 2.8778(1)  | 2.26 | 131 |
| O12-H12...O5     | Inter | 0.82 | 3.0670(1)  | 2.33 | 149 |



| Complex 4     |       |      |           |      |     |
|---------------|-------|------|-----------|------|-----|
| O12-H13...O11 | Intra | 0.95 | 2.5518(7) | 2.02 | 113 |
| Complex 5     |       |      |           |      |     |
| O12-H13...O11 | Intra | 0.95 | 2.5272(3) | 1.99 | 113 |

**Table S5** The splitting of the lowest multiplets for Tb<sup>III</sup> ion in **2** and for Ho<sup>III</sup> ion in **5** calculated in OpenMOLCAS/SINGLE\_ANISO together with g-values for selected pseudo-doublets and respective tunneling rates.

| Tb <sup>III</sup>       |                                               | Ho <sup>III</sup>       |                                               |
|-------------------------|-----------------------------------------------|-------------------------|-----------------------------------------------|
| $E$ (cm <sup>-1</sup> ) |                                               | $E$ (cm <sup>-1</sup> ) |                                               |
| 0                       | $g_x = 0.000, g_y = 0.000, g_z = 17.664$      | 0                       | $g_x = 0.000, g_y = 0.000, g_z = 14.992$      |
| 0.759                   | $\Delta_{\text{tun}} = 0.759 \text{ cm}^{-1}$ | 1.28                    | $\Delta_{\text{tun}} = 1.284 \text{ cm}^{-1}$ |
| 81.7                    | $g_x = 0.000, g_y = 0.000, g_z = 13.520$      | 19.4                    | $g_x = 0.000, g_y = 0.000, g_z = 13.676$      |
| 86.2                    | $\Delta_{\text{tun}} = 4.512 \text{ cm}^{-1}$ | 20.5                    | $\Delta_{\text{tun}} = 1.164 \text{ cm}^{-1}$ |
| 112                     |                                               | 118                     |                                               |
| 123                     |                                               | 129                     |                                               |
| 134                     |                                               | 139                     |                                               |
| 159                     |                                               | 143                     |                                               |
| 179                     |                                               | 172                     |                                               |
| 200                     |                                               | 183                     |                                               |
| 208                     |                                               | 216                     |                                               |
| 297                     |                                               | 228                     |                                               |
| 298                     |                                               | 236                     |                                               |
|                         |                                               | 262                     |                                               |
|                         |                                               | 273                     |                                               |
|                         |                                               | 284                     |                                               |
|                         |                                               | 288                     |                                               |

**Table S6** The splitting of the lowest multiplets for Dy<sup>III</sup> ion in **3** compounds calculated in OpenMOLCAS/SINGLE\_ANISO together with g-values for each Kramers doublets and respective transition magnetic moments within each doublet quantifying probability for the quantum tunneling (QTM)

| $E$ (cm <sup>-1</sup> ) | $g_x$ | $g_y$ | $g_z$  | QTM    |
|-------------------------|-------|-------|--------|--------|
| 0.0                     | 0.158 | 0.424 | 19.117 | 0.0969 |
| 66.0                    | 1.737 | 4.549 | 13.217 | 1.2367 |
| 109                     | 0.849 | 3.798 | 10.465 | 1.2907 |
| 168                     | 0.792 | 3.702 | 13.055 | 1.1968 |
| 196                     | 0.442 | 2.082 | 15.622 | 0.5586 |
| 217                     | 0.521 | 4.284 | 11.720 | 2.1553 |
| 278                     | 0.225 | 3.411 | 10.144 | 2.2887 |
| 320                     | 1.031 | 4.878 | 15.328 | 1.2805 |

**Table S7** The splitting of the lowest multiplets for Dy<sup>III</sup> ion in **4** compounds calculated in OpenMOLCAS/SINGLE\_ANISO together with *g*-values for each Kramers doublets and respective transition magnetic moments within each doublet quantifying probability for the quantum tunneling (QTM)

| <i>E</i> (cm <sup>-1</sup> ) | <i>g<sub>x</sub></i> | <i>g<sub>y</sub></i> | <i>g<sub>z</sub></i> | QTM    |
|------------------------------|----------------------|----------------------|----------------------|--------|
| 0.0                          | 0.359                | 2.296                | 15.611               | 0.4426 |
| 19.2                         | 0.630                | 1.765                | 14.370               | 0.5691 |
| 138                          | 2.719                | 3.940                | 12.790               | 1.1176 |
| 198                          | 8.433                | 6.417                | 0.992                | 1.3767 |
| 263                          | 2.645                | 3.516                | 14.110               | 2.3930 |
| 288                          | 0.554                | 1.083                | 17.844               | 0.6475 |
| 379                          | 0.250                | 0.443                | 17.817               | 0.4472 |
| 470                          | 0.061                | 0.104                | 19.251               | 0.0369 |

**Table S8** The splitting of the lowest multiplets for Co<sup>II</sup> ion in **4** compounds calculated in OpenMOLCAS/SINGLE\_ANISO together with *g*-values for each Kramers doublets

| <i>E</i> (cm <sup>-1</sup> ) | <i>g<sub>x</sub></i> | <i>g<sub>y</sub></i> | <i>g<sub>z</sub></i> |
|------------------------------|----------------------|----------------------|----------------------|
| 0.0                          | 2.232                | 2.853                | 7.405                |
| 215                          | 1.431                | 2.413                | 4.808                |
| 576                          | 3.476                | 3.305                | 0.710                |
| 927                          | 0.069                | 0.099                | 3.22                 |
| 1323                         | 0.567                | 0.873                | 5.547                |
| 1445                         | 1.739                | 2.122                | 3.511                |

**Table S9** The splitting of the lowest multiplets for Co<sup>II</sup> ion in **5** compounds calculated in OpenMOLCAS/SINGLE\_ANISO together with *g*-values for each Kramers doublets

| <i>E</i> (cm <sup>-1</sup> ) | <i>g<sub>x</sub></i> | <i>g<sub>y</sub></i> | <i>g<sub>z</sub></i> |
|------------------------------|----------------------|----------------------|----------------------|
| 0.0                          | 2.250                | 3.089                | 7.176                |
| 202                          | 1.433                | 2.111                | 5.107                |
| 603                          | 3.943                | 3.392                | 0.914                |
| 944                          | 0.023                | 0.216                | 3.286                |
| 1325                         | 0.535                | 0.834                | 5.489                |
| 1447                         | 1.731                | 2.119                | 3.478                |
